# Supplementary material
Source: PubMed Central journal article supplement (PMC9283192)
Supplement: 125_2022_5704_MOESM1_ESM.pdf [file 125_2022_5704_MOESM1_ESM.pdf]

# Health impact of seven herpesviruses on (pre)diabetes incidence and HbA1c: results from the KORA cohort

## Electronic supplementary material – contents

|                                                                                                                                                                |    |
|----------------------------------------------------------------------------------------------------------------------------------------------------------------|----|
| ESM Table 1: Demographical overview at baseline (F4) and follow-up (FF4).....                                                                                  | 3  |
| ESM Table 2: Comparison of baseline (F4) characteristics of participants and non-participants.....                                                             | 3  |
| ESM Table 3: Comparison of baseline (F4) characteristics of at risk participants and at risk non-participants ....                                             | 4  |
| ESM Table 4: Antigens for 7 human herpesviruses .....                                                                                                          | 4  |
| ESM Table 5: Individual model coefficients for incidence models for HSV1 .....                                                                                 | 5  |
| ESM Table 6: Individual model coefficients for incidence models for HSV2 .....                                                                                 | 5  |
| ESM Table 7: Individual model coefficients for incidence models for VZV .....                                                                                  | 6  |
| ESM Table 8: Individual model coefficients for incidence models for EBV .....                                                                                  | 6  |
| ESM Table 9: Individual model coefficients for incidence models for CMV .....                                                                                  | 7  |
| ESM Table 10: Individual model coefficients for incidence models for HHV6.....                                                                                 | 7  |
| ESM Table 11: Individual model coefficients for incidence models for HHV7.....                                                                                 | 8  |
| <br>                                                                                                                                                           |    |
| ESM Figure 1: Flowchart of participant selection .....                                                                                                         | 9  |
| ESM Figure 2: Comparing glucose tolerance status at baseline (F4) and follow-up (FF4) with on average 6.5 years in between (n=1967) .....                      | 9  |
| ESM Figure 3: T2D risk factors age, overweight, smoking, and poor-education at F4 timepoint.....                                                               | 10 |
| ESM Figure 4: Viral seroprevalences at baseline (F4) and follow-up (FF4) for the seven herpesviruses under investigation (n=1967, except for VZV n=1540) ..... | 10 |
| ESM Figure 5: Changes of number of seropositive viruses per person from F4 to FF4 (n=1540) (B). .....                                                          | 11 |
| ESM Figure 6: Overview of serostatus change for HSV1 gG antigen .....                                                                                          | 11 |
| ESM Figure 7: Overview of serostatus change for HSV2 mgG unique antigen.....                                                                                   | 12 |
| ESM Figure 8: Overview of serostatus change for VZV gI(ORF67) antigen .....                                                                                    | 12 |
| ESM Figure 9: Overview of serostatus change for VZV gE(ORF68) antigen .....                                                                                    | 13 |
| ESM Figure 10: Overview of serostatus change for EBV Zebra antigen .....                                                                                       | 13 |
| ESM Figure 11: Overview of serostatus change for EBV EBNA-1 antigen.....                                                                                       | 14 |
| ESM Figure 12: Overview of serostatus change for EBV EA-D antigen .....                                                                                        | 14 |

|                                                                                                                                                  |    |
|--------------------------------------------------------------------------------------------------------------------------------------------------|----|
| ESM Figure 13: Overview of serostatus change for EBV VCA p18 antigen .....                                                                       | 15 |
| ESM Figure 14: Overview of serostatus change for CMV pp28 antigen .....                                                                          | 15 |
| ESM Figure 15: Overview of serostatus change for CMV pp52 antigen .....                                                                          | 16 |
| ESM Figure 16: Overview of serostatus change for CMV pp65 antigen .....                                                                          | 16 |
| ESM Figure 17: Overview of serostatus change for CMV pp150 Nter antigen .....                                                                    | 17 |
| ESM Figure 18: Overview of serostatus change for HHV6 IE1A trunc. antigen .....                                                                  | 17 |
| ESM Figure 19: Overview of serostatus change for HHV6 p100 trunc. antigen .....                                                                  | 18 |
| ESM Figure 20: Overview of serostatus change for HHV6 IE1B trunc. antigen .....                                                                  | 18 |
| ESM Figure 21: Overview of serostatus change for HHV6 p101K trunc. antigen .....                                                                 | 19 |
| ESM Figure 22: Overview of serostatus change for HHV7 U14 antigen .....                                                                          | 19 |
| ESM Figure 23: Contingency table and contribution of individual covariates for the association of HSV1 with (pre)diabetes incidence .....        | 20 |
| ESM Figure 24: Contingency table and contribution of individual covariates for the association of HSV2 with (pre)diabetes incidence .....        | 20 |
| ESM Figure 25: Contingency table and contribution of individual covariates for the association of VZV with (pre)diabetes incidence .....         | 20 |
| ESM Figure 26: Contingency table and contribution of individual covariates for the association of EBV with (pre)diabetes incidence .....         | 21 |
| ESM Figure 27: Contingency table and contribution of individual covariates for the association of CMV with (pre)diabetes incidence .....         | 21 |
| ESM Figure 28: Contingency table and contribution of individual covariates for the association of HHV6 with (pre)diabetes incidence .....        | 21 |
| ESM Figure 29: Contingency table and contribution of individual covariates for the association of HHV7 with (pre)diabetes incidence .....        | 22 |
| ESM Figure 30: Mutually adjusted associations of herpesvirus seropositivity with incidence of (pre)diabetes (n=1257, 95% CI in brackets) .....   | 23 |
| ESM Figure 31: Mutually adjusted cross-sectional association of herpesvirus serostatus with HbA1c at baseline (n=1967, 95% CI in brackets) ..... | 24 |

## ESM Tables

ESM Table 1: Demographical overview at baseline (F4) and follow-up (FF4)

|                                        | Main analyses (n=1967) |                  | VZV (due to antibody failure n=1540) |                  |
|----------------------------------------|------------------------|------------------|--------------------------------------|------------------|
|                                        | Baseline (F4)          | Follow-up (FF4)  | Baseline (F4)                        | Follow-up (FF4)  |
| Male                                   | 968 (49.2%)            |                  | 765 (49.7%)                          |                  |
| Median age (years)                     | 54 (range 32–81)       | 61 (range 39–88) | 54 (range 32–81)                     | 61 (range 39–88) |
| Median BMI (kg/m <sup>2</sup> )        | 27 (IQR 24–30)         | 27 (IQR 24–31)   | 27 (IQR 24–30)                       | 27 (IQR 24–31)   |
| Median years of education              | 11 (IQR 10–13)         | 11 (IQR 10–13)   | 11 (IQR 10–13)                       | 11 (IQR 10–13)   |
| Percent ever smoker (median packyears) | 57.9% (15.0 PY)        | 58.1% (15.4 PY)  | 58.0% (15.0 PY)                      | 58.1% (15.3 PY)  |
| Number IFG/IGT                         | 542 (27.5%)            | 713 (36.2%)      | 422 (27.4%)                          | 561 (36.4%)      |
| Number T2D                             | 168 (8.5%)             | 287 (14.6%)      | 132 (8.6%)                           | 233 (15.1%)      |

ESM Table 2: Comparison of baseline (F4) characteristics of participants and non-participants

|                                    | Participants (n=1967)                                   | Non-participants (n=1110)                                 | Difference p-value |
|------------------------------------|---------------------------------------------------------|-----------------------------------------------------------|--------------------|
| Male                               | 968 (49.2%)                                             | 517 (46.6%)                                               | =0.2               |
| Median age (years)                 | 54 (IQR 43-64, range 32-81)                             | 62 (IQR 47-72, range 32-81)                               | <0.001             |
| Median BMI (kg/m <sup>2</sup> )    | 26.68 (IQR 24.16-29.91, range 16.32-51.65), 2 (0.1%) NA | 27.53 (IQR 24.655-30.82, range 16.05-55.99), 15 (1.4%) NA | <0.001             |
| Median years of education          | 11 (IQR 10-13, range 8-17), 4 (0.2%) NA                 | 10 (IQR 10-13, range 8-17), 1 (0.1%) NA                   | <0.001             |
| Ever smoker                        | 1139 (57.9%), 1 (0.1%) NA                               | 655 (59.3%), 5 (0.5%) NA                                  | =0.5               |
| Physically active                  | 1150 (58.5%)                                            | 521 (47.1%), 5 (0.5%) NA                                  | <0.001             |
| Parental diabetes                  | 451 (30.4%), 482 (24.5%) NA                             | 190 (29.7%), 470 (42.3%) NA                               | =0.8               |
| Hypertension                       | 328 (16.7%), 3 (0.2%) NA                                | 221 (20.0%), 5 (0.5%) NA                                  | =0.03              |
| Median triglycerides (mmol/l)      | 1.17 (IQR 0.79-1.66, range 0.24-10.25), 1 (0.1%) NA     | 1.23 (IQR 0.87-1.78, range 0.25-18.59), 5 (0.5%) NA       | <0.001             |
| Median total cholesterol / HDL-C   | 3.91 (IQR 3.21-4.73, range 1.87-11.71), 1 (0.1%) NA     | 3.91 (IQR 3.26-4.77, range 1.84-9.4), 5 (0.5%) NA         | =0.2               |
| Median HOMA-IR                     | 1.95 (IQR 1.35-2.93, range 0.3-26.03), 86 (4.4%) NA     | 2.12 (IQR 1.47-3.29, range 0.56-24.82), 153 (13.8%) NA    | <0.001             |
| Median fasting glucose (mmol/l)    | 5.17 (IQR 4.89-5.61, range 3.61-14), 4 (0.2%) NA        | 5.28 (IQR 4.89-5.83, range 3.61-18.94), 35 (3.2%) NA      | <0.001             |
| HSV1 serostatus                    | 1731 (88.0%)                                            | 969 (90.8%), 43 (3.9%) NA                                 | =0.02              |
| HSV2 serostatus                    | 211 (10.7%)                                             | 133 (12.5%), 43 (3.9%) NA                                 | =0.2               |
| VZV serostatus                     | 1345 (78.5%), 253 (12.9%) NA                            | 684 (78.4%), 238 (21.4%) NA                               | =1                 |
| EBV serostatus                     | 1926 (97.9%)                                            | 1047 (98.1%), 43 (3.9%) NA                                | =0.8               |
| CMV serostatus                     | 903 (45.9%)                                             | 574 (53.8%), 43 (3.9%) NA                                 | <0.001             |
| HHV6 serostatus                    | 768 (39.0%)                                             | 427 (40.0%), 43 (3.9%) NA                                 | =0.6               |
| HHV7 serostatus                    | 1672 (85.0%)                                            | 906 (84.9%), 43 (3.9%) NA                                 | =1                 |
| Number IFG/IGT                     | 542 (27.6%)                                             | 311 (28.0%)                                               | =0.8               |
| Number T2D                         | 168 (8.5%)                                              | 174 (15.7%)                                               | <0.001             |
| Number T1D / drug-induced diabetes | 0                                                       | 9 (0.8%)                                                  | <0.001             |
| Number missing oGTT                | 0                                                       | 81 (7.3%)                                                 | <0.001             |

ESM Table 3: Comparison of baseline (F4) characteristics of at risk participants and at risk non-participants

|                                  | At risk participants (n=1257)                              | At risk non-participants (n=535)                         | Difference p-value |
|----------------------------------|------------------------------------------------------------|----------------------------------------------------------|--------------------|
| Male                             | 528 (42.0%)                                                | 216 (40.4%)                                              | =0.6               |
| Median age (years)               | 49 (IQR 41-59, range 32-81)                                | 53 (IQR 42-66.5, range 32-81)                            | <0.001             |
| Median BMI (kg/m <sup>2</sup> )  | 25.595 (IQR 23.32-28.4775, range 16.32-46.73), 1 (0.1%) NA | 25.815 (IQR 23.265-29.02, range 17.5-44.79), 1 (0.2%) NA | =0.5               |
| Median years of education        | 11 (IQR 10-13, range 8-17), 4 (0.3%) NA                    | 11 (IQR 10-13, range 8-17)                               | =0.02              |
| Ever smoker                      | 728 (58.0%), 1 (0.1%) NA                                   | 316 (59.4%), 3 (0.6%) NA                                 | =0.6               |
| Physically active                | 769 (61.2%)                                                | 267 (50.2%), 3 (0.6%) NA                                 | <0.001             |
| Parental diabetes                | 266 (26.2%), 242 (19.3%) NA                                | 96 (26.6%), 174 (32.5%) NA                               | =0.9               |
| Hypertension                     | 131 (10.4%), 2 (0.2%) NA                                   | 75 (14.1%), 3 (0.6%) NA                                  | =0.03              |
| Median triglycerides (mmol/l)    | 1.01 (IQR 0.71-1.44, range 0.24-6.93)                      | 1.09 (IQR 0.78-1.59, range 0.26-6.33)                    | =0.003             |
| Median total cholesterol / HDL-C | 3.67 (IQR 3.02-4.43, range 1.87-8.26)                      | 3.69 (IQR 3.12-4.555, range 1.84-7.94)                   | =0.2               |
| Median HOMA-IR                   | 1.67 (IQR 1.19-2.25, range 0.3-11.72), 8 (0.6%) NA         | 1.73 (IQR 1.19-2.3675, range 0.56-15.11), 13 (2.4%) NA   | =0.1               |
| Median fasting glucose (mmol/l)  | 5 (IQR 4.72-5.22, range 3.61-5.5)                          | 5 (IQR 4.72-5.22, range 3.89-5.5)                        | =0.4               |
| HSV1 serostatus                  | 1089 (86.6%)                                               | 453 (88.6%), 24 (4.5%) NA                                | =0.3               |
| HSV2 serostatus                  | 123 (9.8%)                                                 | 78 (15.3%), 24 (4.5%) NA                                 | =0.001             |
| VZV serostatus                   | 840 (77.0%), 166 (13.2%) NA                                | 333 (79.9%), 118 (22.1%) NA                              | =0.3               |
| EBV serostatus                   | 1230 (97.9%)                                               | 499 (97.7%), 24 (4.5%) NA                                | =0.9               |
| CMV serostatus                   | 560 (44.6%)                                                | 250 (48.9%), 24 (4.5%) NA                                | =0.1               |
| HHV6 serostatus                  | 492 (39.1%)                                                | 218 (42.7%), 24 (4.5%) NA                                | =0.2               |
| HHV7 serostatus                  | 1075 (85.5%)                                               | 443 (86.7%), 24 (4.5%) NA                                | =0.6               |

ESM Table 4: Antigens for 7 human herpesviruses

| Virus        | Antigen                                                   | Description                                                                                                                              | MFI-Threshold            |
|--------------|-----------------------------------------------------------|------------------------------------------------------------------------------------------------------------------------------------------|--------------------------|
| HSV1         | gG                                                        | Glycoprotein G                                                                                                                           | 100                      |
| HSV2         | mgG unique                                                | Unique sequence of membrane-bound part of mature glycoprotein G                                                                          | 100                      |
| VZV (1 / 2)  | gI(ORF67)<br>gE(ORF68)                                    | Glycoprotein I<br>Glycoprotein E                                                                                                         | 100<br>80                |
| EBV (2 / 4)  | Zebra<br>EBNA-1<br>EA-D<br>VCA p18                        | Virus protein ZEBRA<br>Nuclear antigen 1 (EBNA-1)<br>Early antigen-diffuse (EA-D)<br>Viral capsid antigen (VCA p18)                      | 150<br>150<br>150<br>200 |
| CMV (2 / 4)  | pp 28<br>pp 52<br>pp 65<br>pp150 Nter                     | Protein pp 28<br>Protein pp 52<br>Protein pp 65<br>Protein pp 150 (N-terminus)                                                           | 150<br>150<br>150<br>150 |
| HHV6 (2 / 4) | IE1A trunc.<br>p100 trunc.<br>IE1B trunc.<br>p101K trunc. | 6A Immediate-Early 1 Protein<br>6A antigenic tegument protein<br>6B Immediate-Early 1 Protein variant B<br>6B antigenic tegument protein | 50<br>50<br>50<br>50     |
| HHV7         | U14                                                       | Protein U14, putative structural function                                                                                                | 100                      |

ESM Table 5: Individual model coefficients for incidence models for HSV1

|                                          | Adjusted model 1             | Adjusted model 2             | Adjusted model 3             | Adjusted model 4                |
|------------------------------------------|------------------------------|------------------------------|------------------------------|---------------------------------|
| <b>HSV1 (binary)</b>                     | 1.14 (0.78, 1.69)<br>p=0.5   | 1.03 (0.69, 1.55)<br>p=0.9   | 1.04 (0.69, 1.58)<br>p=0.9   | 0.98 (0.64, 1.52)<br>p=0.9      |
| <b>Male (binary)</b>                     | 2.22 (1.72, 2.85)<br>p<0.001 | 2.18 (1.67, 2.85)<br>p<0.001 | 1.92 (1.44, 2.56)<br>p<0.001 | 1.28 (0.94, 1.74)<br>p=0.1      |
| <b>Age (years)</b>                       | 1.04 (1.03, 1.05)<br>p<0.001 | 1.04 (1.03, 1.05)<br>p<0.001 | 1.04 (1.03, 1.05)<br>p<0.001 | 1.03 (1.02, 1.04)<br>p<0.001    |
| <b>BMI (kg/m<sup>2</sup>)</b>            |                              | 1.12 (1.09, 1.16)<br>p<0.001 | 1.06 (1.02, 1.10)<br>p=0.005 | 1.06 (1.02, 1.11)<br>p=0.003    |
| <b>Years of education (years)</b>        |                              | 0.96 (0.91, 1.01)<br>p=0.1   | 0.96 (0.91, 1.01)<br>p=0.1   | 0.95 (0.90, 1.01)<br>p=0.09     |
| <b>Ever smoker (binary)</b>              |                              | 1.12 (0.86, 1.46)<br>p=0.4   | 1.10 (0.84, 1.45)<br>p=0.5   | 1.05 (0.79, 1.40)<br>p=0.7      |
| <b>Physically active (binary)</b>        |                              | 0.92 (0.71, 1.21)<br>p=0.6   | 0.96 (0.73, 1.26)<br>p=0.7   | 0.94 (0.71, 1.26)<br>p=0.7      |
| <b>Parental diabetes (binary)</b>        |                              |                              | 1.46 (1.06, 2.00)<br>p=0.02  | 1.33 (0.95, 1.85)<br>p=0.09     |
| <b>Hypertension (binary)</b>             |                              |                              | 1.22 (0.81, 1.83)<br>p=0.3   | 1.16 (0.75, 1.78)<br>p=0.5      |
| <b>Triglycerides (mmol/l)</b>            |                              |                              | 0.88 (0.69, 1.11)<br>p=0.3   | 0.86 (0.67, 1.11)<br>p=0.2      |
| <b>Total cholesterol / HDL-C (ratio)</b> |                              |                              | 1.28 (1.09, 1.50)<br>p=0.003 | 1.31 (1.11, 1.55)<br>p=0.001    |
| <b>HOMA-IR (continuous)</b>              |                              |                              | 1.42 (1.21, 1.68)<br>p<0.001 | 1.06 (0.90, 1.26)<br>p=0.5      |
| <b>Fasting glucose (mmol/l)</b>          |                              |                              |                              | 18.53 (10.51, 33.33)<br>p<0.001 |

ESM Table 6: Individual model coefficients for incidence models for HSV2

|                                          | Adjusted model 1             | Adjusted model 2             | Adjusted model 3             | Adjusted model 4                |
|------------------------------------------|------------------------------|------------------------------|------------------------------|---------------------------------|
| <b>HSV2 (binary)</b>                     | 1.57 (1.05, 2.34)<br>p=0.03  | 1.59 (1.05, 2.40)<br>p=0.03  | 1.57 (1.02, 2.40)<br>p=0.04  | 1.59 (1.01, 2.48)<br>p=0.04     |
| <b>Male (binary)</b>                     | 2.22 (1.72, 2.85)<br>p<0.001 | 2.20 (1.68, 2.87)<br>p<0.001 | 1.94 (1.45, 2.59)<br>p<0.001 | 1.29 (0.95, 1.76)<br>p=0.1      |
| <b>Age (years)</b>                       | 1.04 (1.03, 1.05)<br>p<0.001 | 1.04 (1.03, 1.05)<br>p<0.001 | 1.04 (1.03, 1.05)<br>p<0.001 | 1.03 (1.02, 1.04)<br>p<0.001    |
| <b>BMI (kg/m<sup>2</sup>)</b>            |                              | 1.12 (1.09, 1.16)<br>p<0.001 | 1.06 (1.02, 1.10)<br>p=0.005 | 1.06 (1.02, 1.11)<br>p=0.003    |
| <b>Years of education (years)</b>        |                              | 0.96 (0.91, 1.01)<br>p=0.1   | 0.96 (0.91, 1.01)<br>p=0.1   | 0.95 (0.90, 1.01)<br>p=0.08     |
| <b>Ever smoker (binary)</b>              |                              | 1.10 (0.85, 1.44)<br>p=0.5   | 1.09 (0.83, 1.43)<br>p=0.5   | 1.04 (0.78, 1.39)<br>p=0.8      |
| <b>Physically active (binary)</b>        |                              | 0.93 (0.71, 1.21)<br>p=0.6   | 0.96 (0.73, 1.26)<br>p=0.8   | 0.94 (0.71, 1.26)<br>p=0.7      |
| <b>Parental diabetes (binary)</b>        |                              |                              | 1.45 (1.06, 1.99)<br>p=0.02  | 1.33 (0.95, 1.85)<br>p=0.09     |
| <b>Hypertension (binary)</b>             |                              |                              | 1.18 (0.77, 1.78)<br>p=0.4   | 1.11 (0.72, 1.71)<br>p=0.6      |
| <b>Triglycerides (mmol/l)</b>            |                              |                              | 0.87 (0.68, 1.10)<br>p=0.3   | 0.86 (0.67, 1.10)<br>p=0.2      |
| <b>Total cholesterol / HDL-C (ratio)</b> |                              |                              | 1.28 (1.09, 1.51)<br>p=0.003 | 1.31 (1.11, 1.55)<br>p=0.001    |
| <b>HOMA-IR (continuous)</b>              |                              |                              | 1.42 (1.21, 1.68)<br>p<0.001 | 1.06 (0.90, 1.26)<br>p=0.5      |
| <b>Fasting glucose (mmol/l)</b>          |                              |                              |                              | 18.58 (10.52, 33.45)<br>p<0.001 |

ESM Table 7: Individual model coefficients for incidence models for VZV

|                                          | Adjusted model 1             | Adjusted model 2             | Adjusted model 3             | Adjusted model 4                |
|------------------------------------------|------------------------------|------------------------------|------------------------------|---------------------------------|
| <b>VZV (binary)</b>                      | 0.87 (0.63, 1.19)<br>p=0.4   | 0.76 (0.55, 1.06)<br>p=0.1   | 0.75 (0.54, 1.05)<br>p=0.09  | 0.74 (0.52, 1.06)<br>p=0.1      |
| <b>Male (binary)</b>                     | 2.17 (1.66, 2.84)<br>p<0.001 | 2.13 (1.60, 2.83)<br>p<0.001 | 1.95 (1.44, 2.66)<br>p<0.001 | 1.27 (0.91, 1.77)<br>p=0.2      |
| <b>Age (years)</b>                       | 1.04 (1.03, 1.05)<br>p<0.001 | 1.04 (1.02, 1.05)<br>p<0.001 | 1.04 (1.03, 1.05)<br>p<0.001 | 1.03 (1.01, 1.04)<br>p<0.001    |
| <b>BMI (kg/m<sup>2</sup>)</b>            |                              | 1.12 (1.08, 1.16)<br>p<0.001 | 1.06 (1.02, 1.10)<br>p=0.007 | 1.07 (1.02, 1.11)<br>p=0.004    |
| <b>Years of education (years)</b>        |                              | 0.96 (0.91, 1.02)<br>p=0.2   | 0.97 (0.91, 1.02)<br>p=0.3   | 0.96 (0.90, 1.02)<br>p=0.2      |
| <b>Ever smoker (binary)</b>              |                              | 1.10 (0.83, 1.46)<br>p=0.5   | 1.08 (0.81, 1.44)<br>p=0.6   | 1.02 (0.75, 1.38)<br>p=0.9      |
| <b>Physically active (binary)</b>        |                              | 0.89 (0.67, 1.18)<br>p=0.4   | 0.91 (0.68, 1.22)<br>p=0.5   | 0.90 (0.66, 1.23)<br>p=0.5      |
| <b>Parental diabetes (binary)</b>        |                              |                              | 1.51 (1.07, 2.10)<br>p=0.02  | 1.38 (0.96, 1.96)<br>p=0.08     |
| <b>Hypertension (binary)</b>             |                              |                              | 1.18 (0.76, 1.83)<br>p=0.5   | 1.12 (0.70, 1.76)<br>p=0.6      |
| <b>Triglycerides (mmol/l)</b>            |                              |                              | 0.89 (0.68, 1.14)<br>p=0.3   | 0.87 (0.67, 1.13)<br>p=0.3      |
| <b>Total cholesterol / HDL-C (ratio)</b> |                              |                              | 1.23 (1.04, 1.46)<br>p=0.01  | 1.27 (1.06, 1.52)<br>p=0.009    |
| <b>HOMA-IR (continuous)</b>              |                              |                              | 1.41 (1.19, 1.69)<br>p<0.001 | 1.03 (0.86, 1.23)<br>p=0.8      |
| <b>Fasting glucose (mmol/l)</b>          |                              |                              |                              | 24.89 (13.39, 47.39)<br>p<0.001 |

ESM Table 8: Individual model coefficients for incidence models for EBV

|                                          | Adjusted model 1             | Adjusted model 2             | Adjusted model 3             | Adjusted model 4                |
|------------------------------------------|------------------------------|------------------------------|------------------------------|---------------------------------|
| <b>EBV (binary)</b>                      | 0.55 (0.25, 1.24)<br>p=0.1   | 0.61 (0.26, 1.43)<br>p=0.2   | 0.63 (0.26, 1.51)<br>p=0.3   | 0.59 (0.24, 1.48)<br>p=0.3      |
| <b>Male (binary)</b>                     | 2.18 (1.70, 2.81)<br>p<0.001 | 2.16 (1.65, 2.82)<br>p<0.001 | 1.90 (1.42, 2.53)<br>p<0.001 | 1.27 (0.93, 1.72)<br>p=0.1      |
| <b>Age (years)</b>                       | 1.04 (1.03, 1.06)<br>p<0.001 | 1.04 (1.03, 1.05)<br>p<0.001 | 1.04 (1.03, 1.05)<br>p<0.001 | 1.03 (1.02, 1.04)<br>p<0.001    |
| <b>BMI (kg/m<sup>2</sup>)</b>            |                              | 1.12 (1.09, 1.16)<br>p<0.001 | 1.06 (1.02, 1.10)<br>p=0.006 | 1.06 (1.02, 1.11)<br>p=0.004    |
| <b>Years of education (years)</b>        |                              | 0.96 (0.91, 1.01)<br>p=0.1   | 0.96 (0.91, 1.01)<br>p=0.1   | 0.95 (0.90, 1.01)<br>p=0.09     |
| <b>Ever smoker (binary)</b>              |                              | 1.13 (0.86, 1.47)<br>p=0.4   | 1.11 (0.85, 1.46)<br>p=0.5   | 1.06 (0.80, 1.41)<br>p=0.7      |
| <b>Physically active (binary)</b>        |                              | 0.93 (0.71, 1.21)<br>p=0.6   | 0.96 (0.73, 1.26)<br>p=0.8   | 0.94 (0.71, 1.26)<br>p=0.7      |
| <b>Parental diabetes (binary)</b>        |                              |                              | 1.44 (1.05, 1.98)<br>p=0.02  | 1.32 (0.95, 1.84)<br>p=0.1      |
| <b>Hypertension (binary)</b>             |                              |                              | 1.22 (0.81, 1.84)<br>p=0.3   | 1.16 (0.75, 1.78)<br>p=0.5      |
| <b>Triglycerides (mmol/l)</b>            |                              |                              | 0.88 (0.69, 1.12)<br>p=0.3   | 0.87 (0.68, 1.12)<br>p=0.3      |
| <b>Total cholesterol / HDL-C (ratio)</b> |                              |                              | 1.28 (1.09, 1.50)<br>p=0.003 | 1.31 (1.11, 1.55)<br>p=0.002    |
| <b>HOMA-IR (continuous)</b>              |                              |                              | 1.42 (1.21, 1.67)<br>p<0.001 | 1.06 (0.90, 1.26)<br>p=0.5      |
| <b>Fasting glucose (mmol/l)</b>          |                              |                              |                              | 18.58 (10.53, 33.42)<br>p<0.001 |

ESM Table 9: Individual model coefficients for incidence models for CMV

|                                          | Adjusted model 1             | Adjusted model 2             | Adjusted model 3             | Adjusted model 4                |
|------------------------------------------|------------------------------|------------------------------|------------------------------|---------------------------------|
| <b>CMV (binary)</b>                      | 1.37 (1.06, 1.77)<br>p=0.02  | 1.35 (1.03, 1.76)<br>p=0.03  | 1.37 (1.04, 1.79)<br>p=0.02  | 1.33 (1.00, 1.78)<br>p=0.05     |
| <b>Male (binary)</b>                     | 2.28 (1.77, 2.95)<br>p<0.001 | 2.26 (1.73, 2.97)<br>p<0.001 | 2.00 (1.50, 2.68)<br>p<0.001 | 1.33 (0.98, 1.82)<br>p=0.07     |
| <b>Age (years)</b>                       | 1.04 (1.03, 1.05)<br>p<0.001 | 1.04 (1.02, 1.05)<br>p<0.001 | 1.04 (1.03, 1.05)<br>p<0.001 | 1.03 (1.01, 1.04)<br>p<0.001    |
| <b>BMI (kg/m<sup>2</sup>)</b>            |                              | 1.12 (1.09, 1.16)<br>p<0.001 | 1.06 (1.02, 1.10)<br>p=0.006 | 1.06 (1.02, 1.11)<br>p=0.004    |
| <b>Years of education (years)</b>        |                              | 0.96 (0.91, 1.01)<br>p=0.09  | 0.96 (0.91, 1.01)<br>p=0.1   | 0.95 (0.90, 1.01)<br>p=0.08     |
| <b>Ever smoker (binary)</b>              |                              | 1.10 (0.84, 1.44)<br>p=0.5   | 1.09 (0.83, 1.43)<br>p=0.6   | 1.03 (0.78, 1.38)<br>p=0.8      |
| <b>Physically active (binary)</b>        |                              | 0.93 (0.71, 1.22)<br>p=0.6   | 0.97 (0.74, 1.28)<br>p=0.8   | 0.96 (0.72, 1.28)<br>p=0.8      |
| <b>Parental diabetes (binary)</b>        |                              |                              | 1.44 (1.05, 1.98)<br>p=0.02  | 1.32 (0.95, 1.84)<br>p=0.1      |
| <b>Hypertension (binary)</b>             |                              |                              | 1.26 (0.83, 1.89)<br>p=0.3   | 1.20 (0.78, 1.84)<br>p=0.4      |
| <b>Triglycerides (mmol/l)</b>            |                              |                              | 0.87 (0.68, 1.11)<br>p=0.3   | 0.86 (0.67, 1.10)<br>p=0.2      |
| <b>Total cholesterol / HDL-C (ratio)</b> |                              |                              | 1.27 (1.09, 1.50)<br>p=0.003 | 1.31 (1.11, 1.56)<br>p=0.001    |
| <b>HOMA-IR (continuous)</b>              |                              |                              | 1.43 (1.22, 1.69)<br>p<0.001 | 1.07 (0.90, 1.27)<br>p=0.4      |
| <b>Fasting glucose (mmol/l)</b>          |                              |                              |                              | 18.39 (10.41, 33.12)<br>p<0.001 |

ESM Table 10: Individual model coefficients for incidence models for HHV6

|                                          | Adjusted model 1             | Adjusted model 2             | Adjusted model 3             | Adjusted model 4                |
|------------------------------------------|------------------------------|------------------------------|------------------------------|---------------------------------|
| <b>HHV6 (binary)</b>                     | 1.20 (0.93, 1.55)<br>p=0.2   | 1.21 (0.93, 1.57)<br>p=0.2   | 1.18 (0.90, 1.54)<br>p=0.2   | 1.26 (0.95, 1.67)<br>p=0.1      |
| <b>Male (binary)</b>                     | 2.22 (1.73, 2.86)<br>p<0.001 | 2.19 (1.68, 2.87)<br>p<0.001 | 1.93 (1.45, 2.58)<br>p<0.001 | 1.30 (0.95, 1.76)<br>p=0.1      |
| <b>Age (years)</b>                       | 1.04 (1.03, 1.06)<br>p<0.001 | 1.04 (1.03, 1.05)<br>p<0.001 | 1.04 (1.03, 1.05)<br>p<0.001 | 1.03 (1.02, 1.04)<br>p<0.001    |
| <b>BMI (kg/m<sup>2</sup>)</b>            |                              | 1.12 (1.09, 1.16)<br>p<0.001 | 1.06 (1.02, 1.10)<br>p=0.005 | 1.06 (1.02, 1.11)<br>p=0.003    |
| <b>Years of education (years)</b>        |                              | 0.96 (0.91, 1.01)<br>p=0.1   | 0.96 (0.91, 1.01)<br>p=0.1   | 0.95 (0.90, 1.01)<br>p=0.08     |
| <b>Ever smoker (binary)</b>              |                              | 1.11 (0.85, 1.45)<br>p=0.4   | 1.10 (0.84, 1.44)<br>p=0.5   | 1.04 (0.78, 1.39)<br>p=0.8      |
| <b>Physically active (binary)</b>        |                              | 0.93 (0.71, 1.21)<br>p=0.6   | 0.96 (0.73, 1.27)<br>p=0.8   | 0.95 (0.71, 1.27)<br>p=0.7      |
| <b>Parental diabetes (binary)</b>        |                              |                              | 1.46 (1.06, 2.00)<br>p=0.02  | 1.34 (0.96, 1.86)<br>p=0.09     |
| <b>Hypertension (binary)</b>             |                              |                              | 1.22 (0.81, 1.84)<br>p=0.3   | 1.16 (0.75, 1.78)<br>p=0.5      |
| <b>Triglycerides (mmol/l)</b>            |                              |                              | 0.88 (0.69, 1.12)<br>p=0.3   | 0.87 (0.68, 1.11)<br>p=0.3      |
| <b>Total cholesterol / HDL-C (ratio)</b> |                              |                              | 1.27 (1.08, 1.50)<br>p=0.003 | 1.31 (1.11, 1.55)<br>p=0.002    |
| <b>HOMA-IR (continuous)</b>              |                              |                              | 1.42 (1.21, 1.68)<br>p<0.001 | 1.06 (0.89, 1.25)<br>p=0.5      |
| <b>Fasting glucose (mmol/l)</b>          |                              |                              |                              | 18.97 (10.73, 34.22)<br>p<0.001 |

ESM Table 11: Individual model coefficients for incidence models for HHV7

|                                          | Adjusted model 1             | Adjusted model 2             | Adjusted model 3             | Adjusted model 4                |
|------------------------------------------|------------------------------|------------------------------|------------------------------|---------------------------------|
| <b>HHV7 (binary)</b>                     | 0.93 (0.66, 1.33)<br>p=0.7   | 0.95 (0.66, 1.37)<br>p=0.8   | 0.91 (0.63, 1.32)<br>p=0.6   | 0.99 (0.68, 1.46) p=1           |
| <b>Male (binary)</b>                     | 2.20 (1.71, 2.83)<br>p<0.001 | 2.17 (1.66, 2.84)<br>p<0.001 | 1.91 (1.43, 2.55)<br>p<0.001 | 1.28 (0.94, 1.74)<br>p=0.1      |
| <b>Age (years)</b>                       | 1.04 (1.03, 1.05)<br>p<0.001 | 1.04 (1.03, 1.05)<br>p<0.001 | 1.04 (1.03, 1.05)<br>p<0.001 | 1.03 (1.02, 1.04)<br>p<0.001    |
| <b>BMI (kg/m<sup>2</sup>)</b>            |                              | 1.12 (1.09, 1.16)<br>p<0.001 | 1.06 (1.02, 1.10)<br>p=0.005 | 1.06 (1.02, 1.11)<br>p=0.003    |
| <b>Years of education (years)</b>        |                              | 0.96 (0.91, 1.01)<br>p=0.1   | 0.96 (0.91, 1.01)<br>p=0.1   | 0.95 (0.90, 1.01)<br>p=0.09     |
| <b>Ever smoker (binary)</b>              |                              | 1.12 (0.86, 1.46)<br>p=0.4   | 1.10 (0.84, 1.45)<br>p=0.5   | 1.05 (0.79, 1.40)<br>p=0.7      |
| <b>Physically active (binary)</b>        |                              | 0.92 (0.71, 1.21)<br>p=0.6   | 0.96 (0.73, 1.26)<br>p=0.8   | 0.94 (0.71, 1.26)<br>p=0.7      |
| <b>Parental diabetes (binary)</b>        |                              |                              | 1.46 (1.06, 2.00)<br>p=0.02  | 1.33 (0.96, 1.85)<br>p=0.09     |
| <b>Hypertension (binary)</b>             |                              |                              | 1.23 (0.81, 1.85)<br>p=0.3   | 1.16 (0.75, 1.78)<br>p=0.5      |
| <b>Triglycerides (mmol/l)</b>            |                              |                              | 0.88 (0.69, 1.12)<br>p=0.3   | 0.86 (0.67, 1.11)<br>p=0.2      |
| <b>Total cholesterol / HDL-C (ratio)</b> |                              |                              | 1.28 (1.09, 1.50)<br>p=0.003 | 1.31 (1.11, 1.55)<br>p=0.001    |
| <b>HOMA-IR (continuous)</b>              |                              |                              | 1.42 (1.21, 1.68)<br>p<0.001 | 1.06 (0.90, 1.26)<br>p=0.5      |
| <b>Fasting glucose (mmol/l)</b>          |                              |                              |                              | 18.51 (10.49, 33.31)<br>p<0.001 |



## ESM Figures

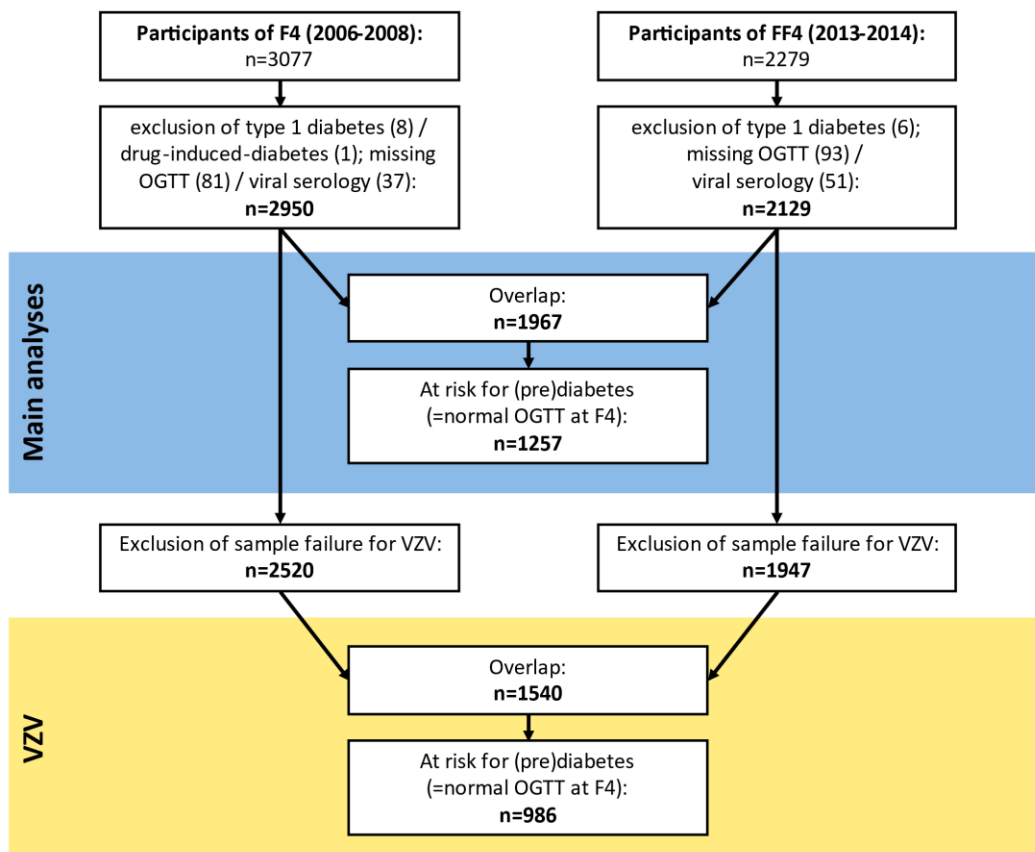

ESM Figure 1: Flowchart of participant selection

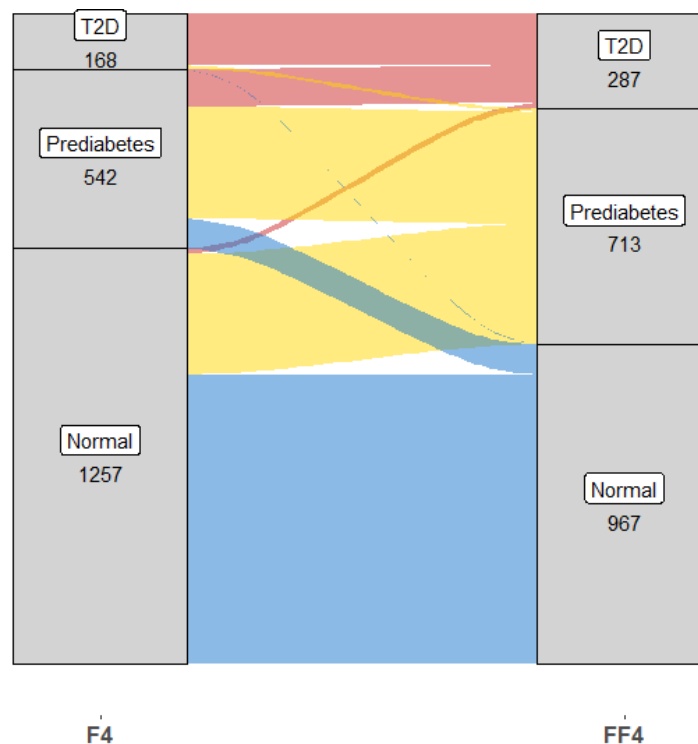

ESM Figure 2: Comparing glucose tolerance status at baseline (F4) and follow-up (FF4) with on average 6.5 years in between (n=1967)

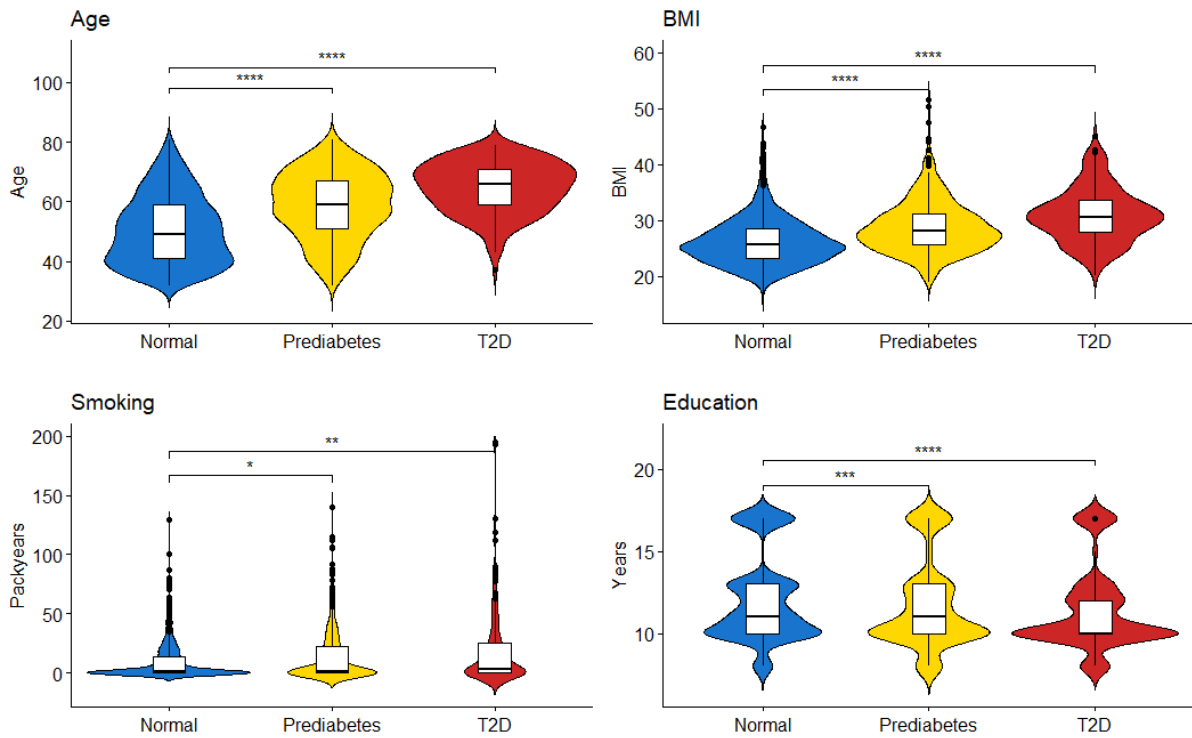

ESM Figure 3: T2D risk factors age, overweight, smoking, and poor-education at F4 timepoint

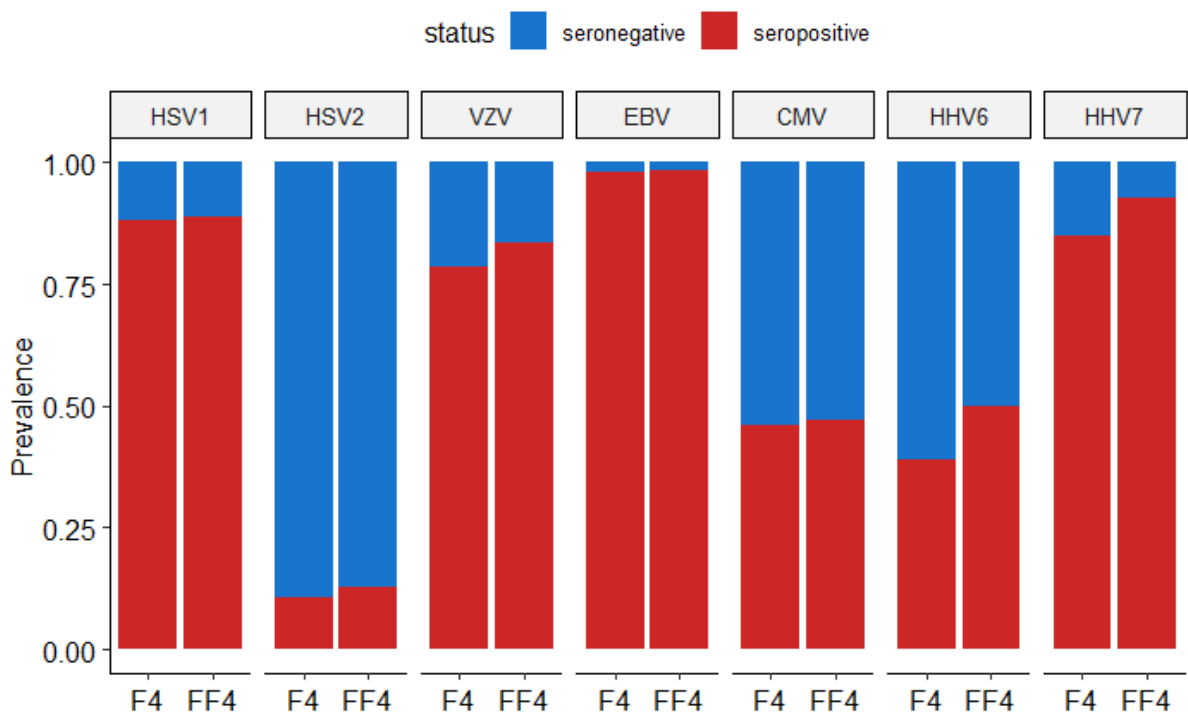

ESM Figure 4: Viral seroprevalences at baseline (F4) and follow-up (FF4) for the seven herpesviruses under investigation (n=1967, except for VZV n=1540)

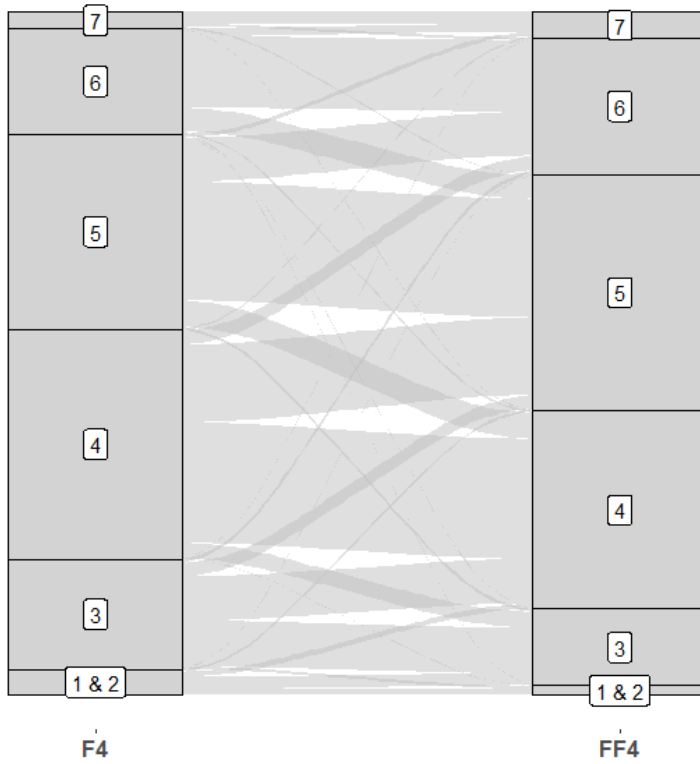

ESM Figure 5: Changes of number of seropositive viruses per person from F4 to FF4 (n=1540) (B).

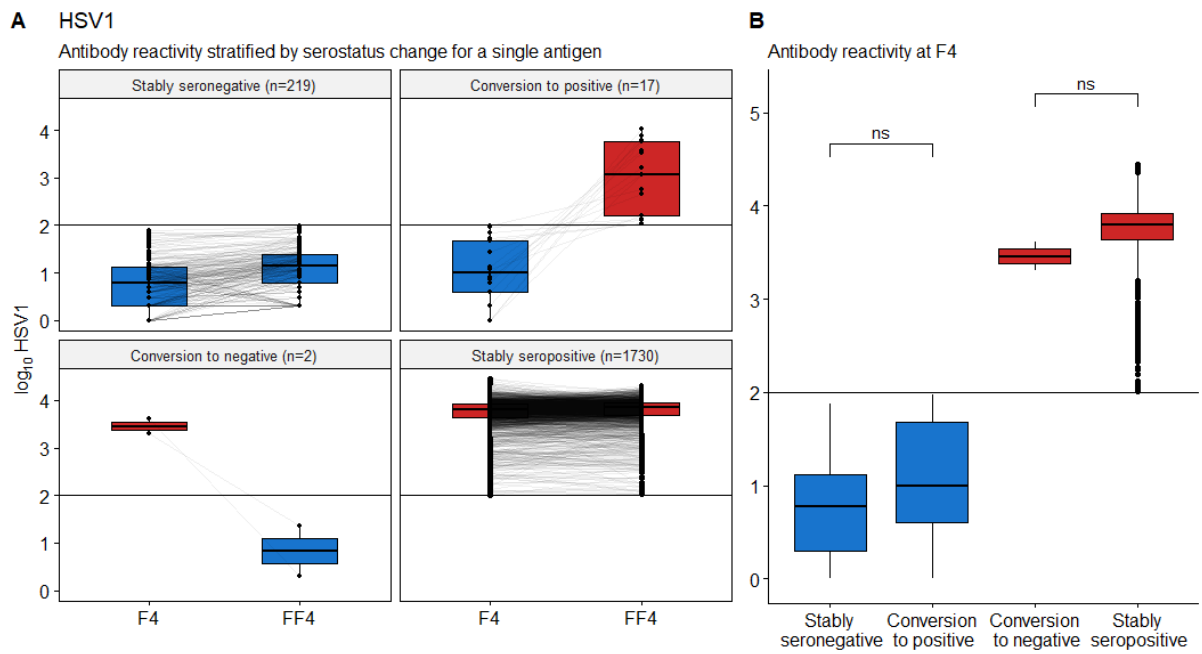

ESM Figure 6: Overview of serostatus change for HSV1 gG antigen

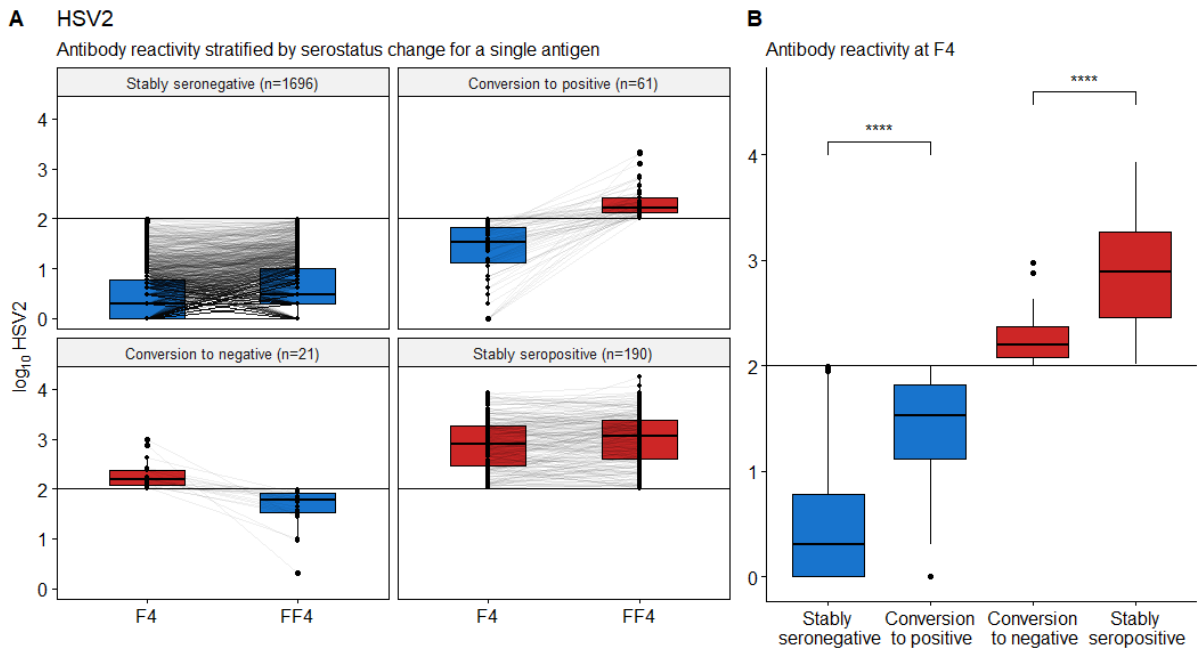

ESM Figure 7: Overview of serostatus change for HSV2 mgG unique antigen

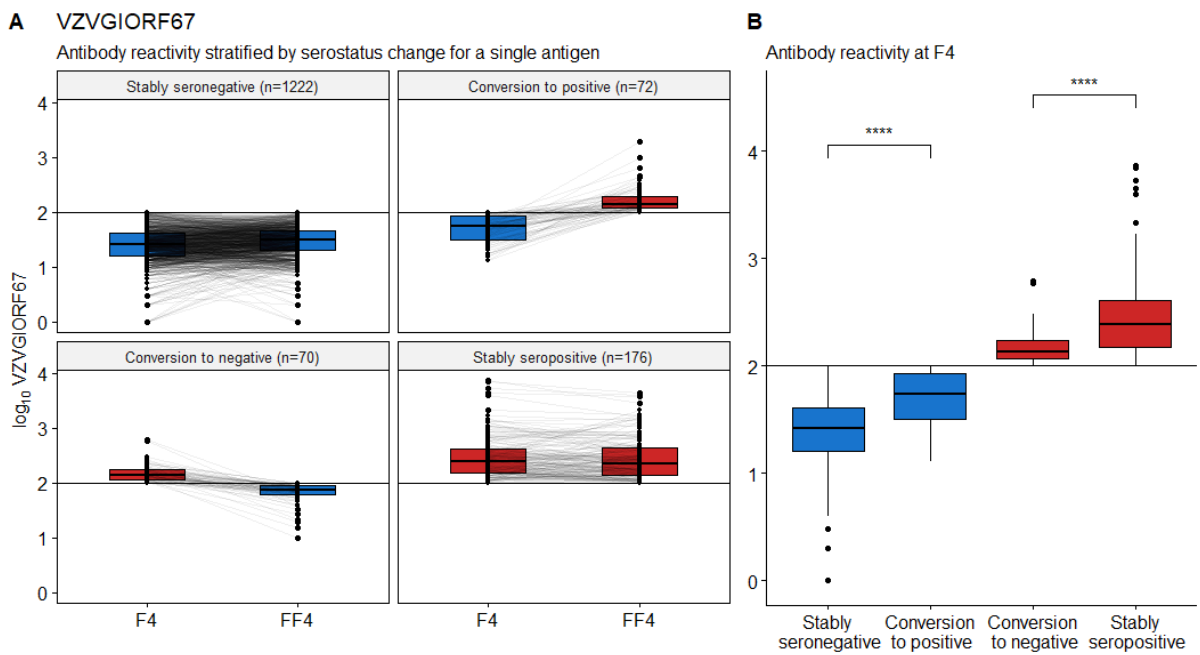

ESM Figure 8: Overview of serostatus change for VZV gI(ORF67) antigen

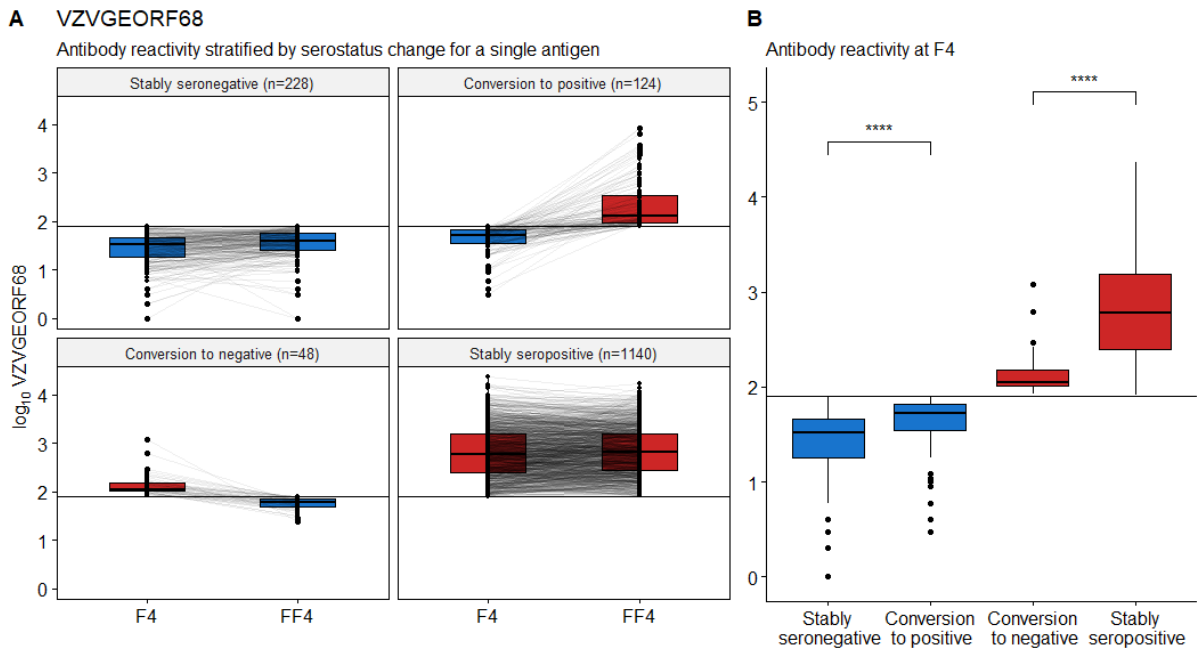

ESM Figure 9: Overview of serostatus change for VZV gE(ORF68) antigen

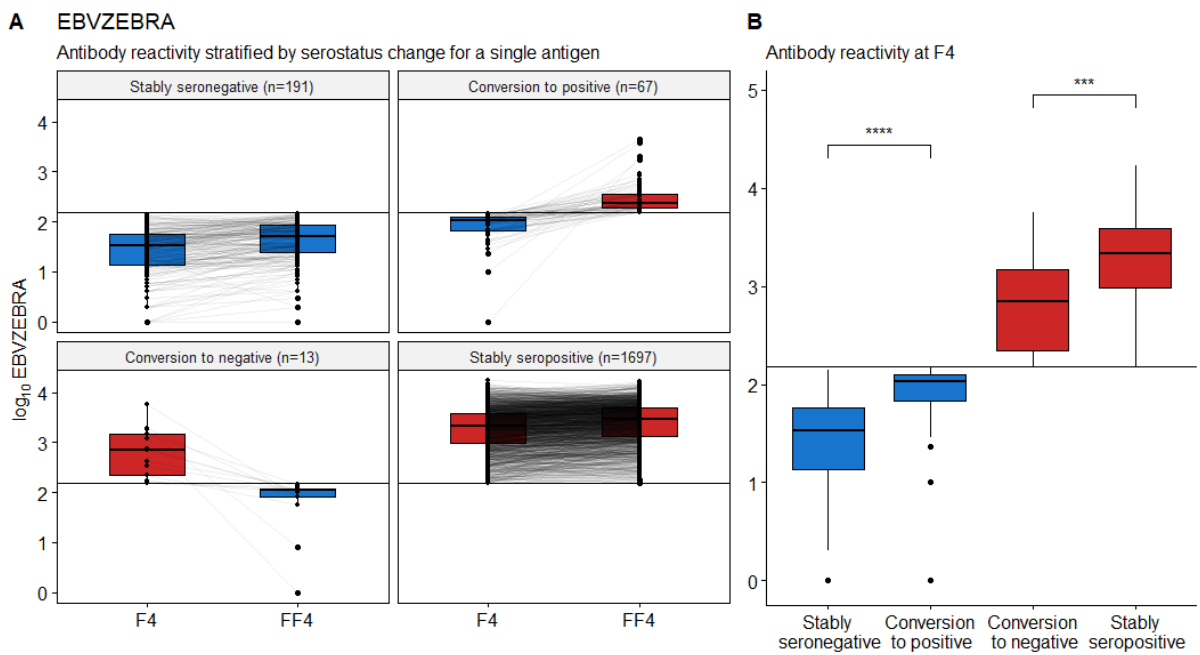

ESM Figure 10: Overview of serostatus change for EBV Zebra antigen

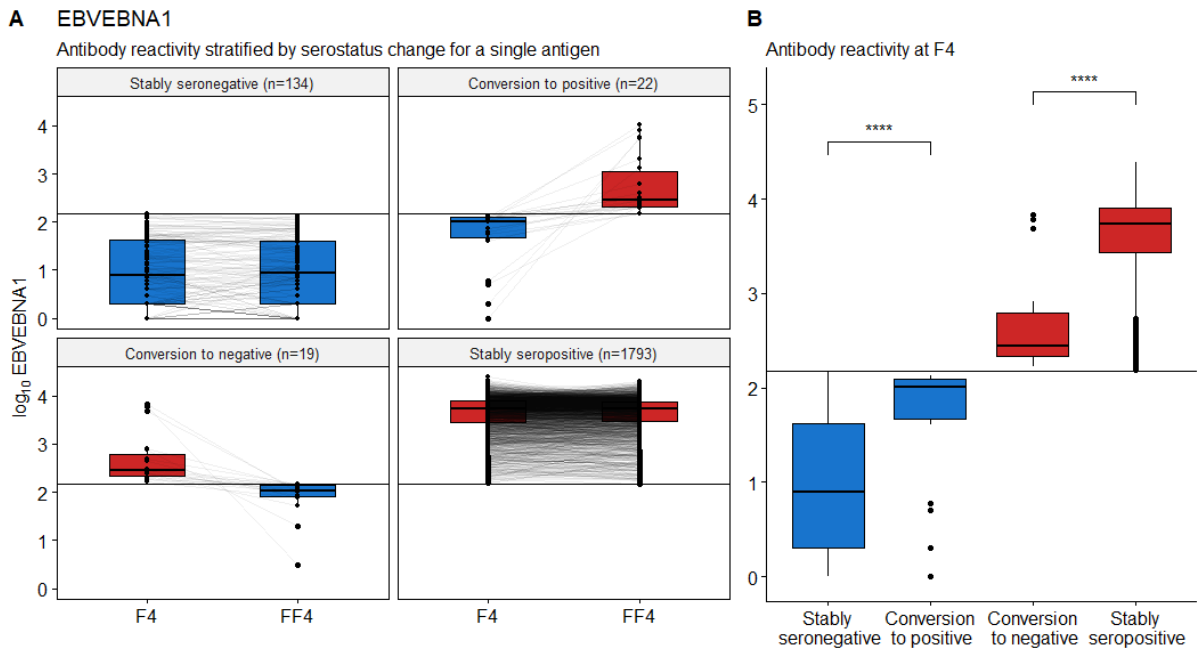

ESM Figure 11: Overview of serostatus change for EBV EBNA-1 antigen

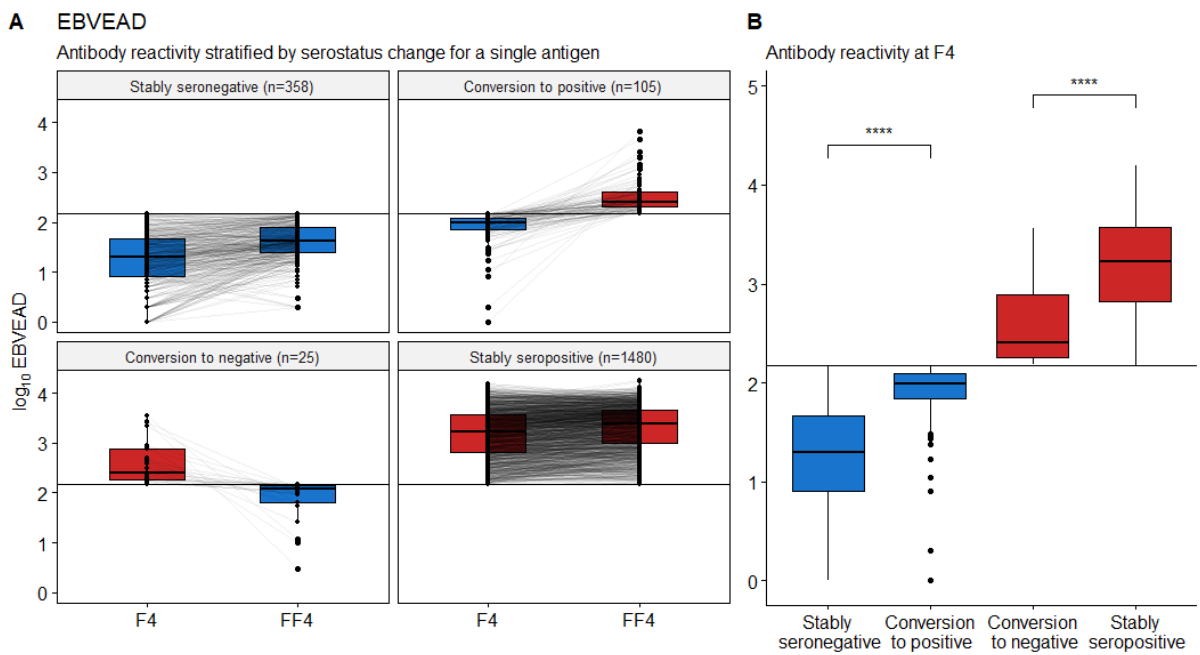

ESM Figure 12: Overview of serostatus change for EBV EA-D antigen

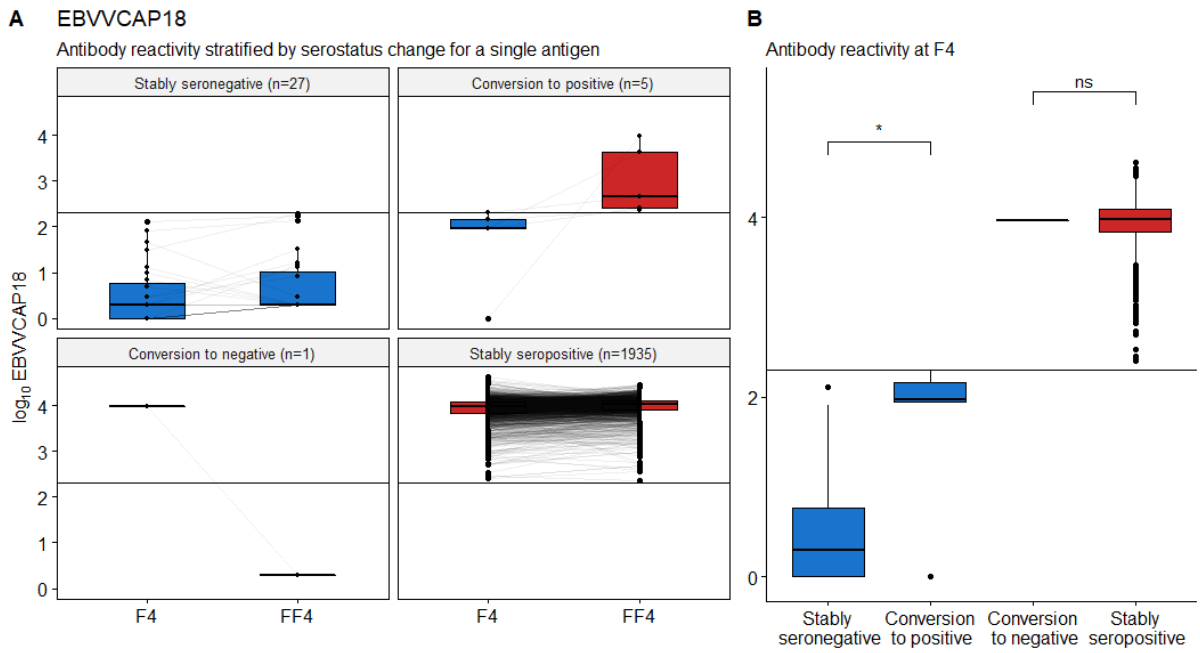

ESM Figure 13: Overview of serostatus change for EBV VCA p18 antigen

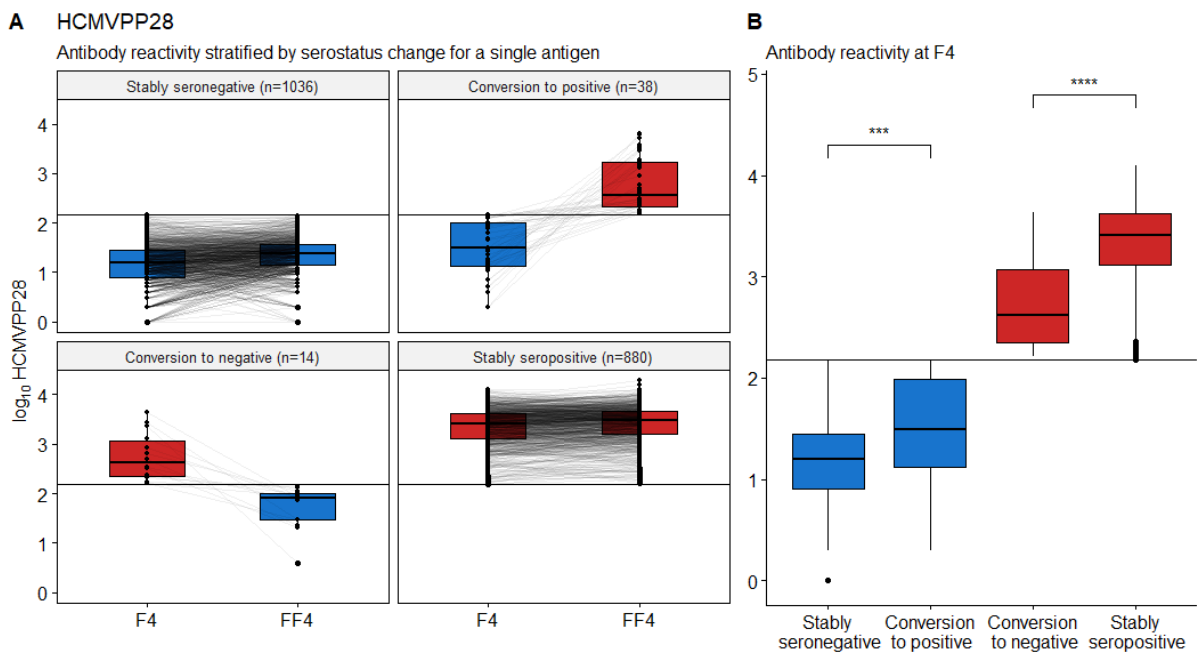

ESM Figure 14: Overview of serostatus change for CMV pp28 antigen

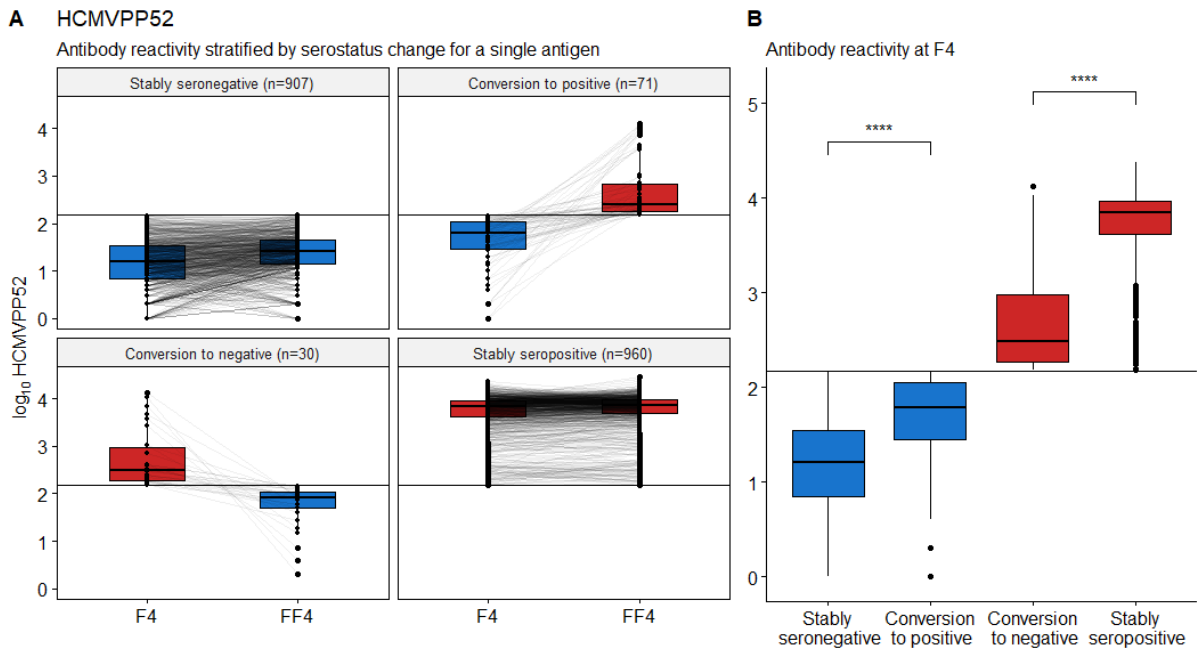

ESM Figure 15: Overview of serostatus change for CMV pp52 antigen

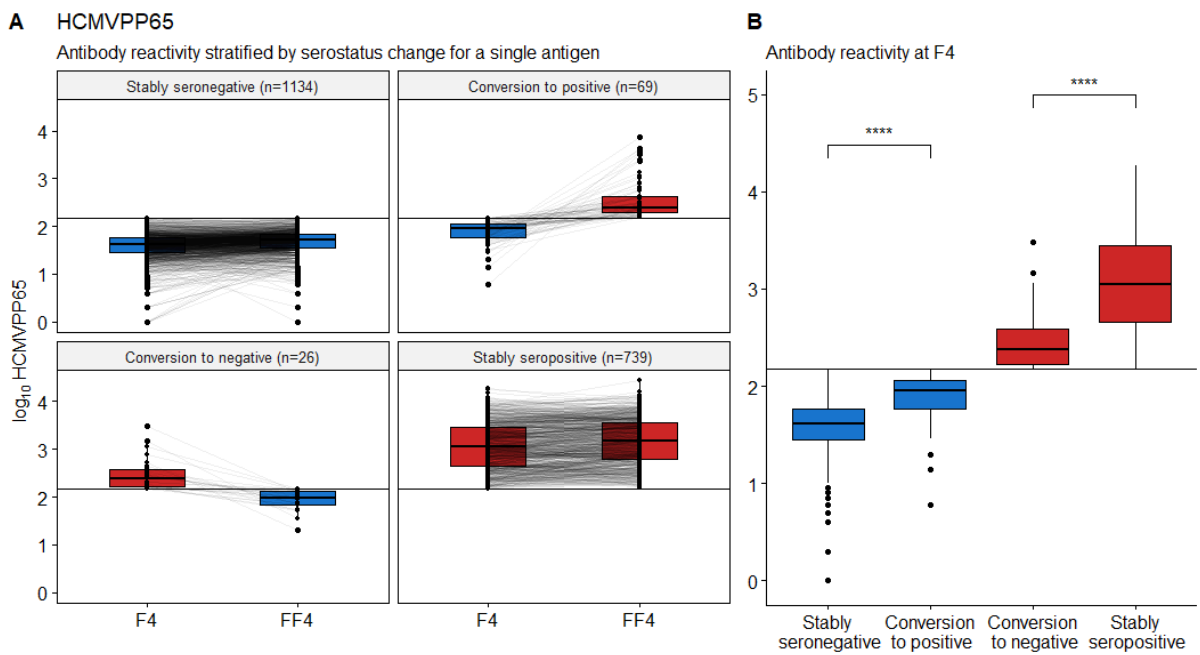

ESM Figure 16: Overview of serostatus change for CMV pp65 antigen



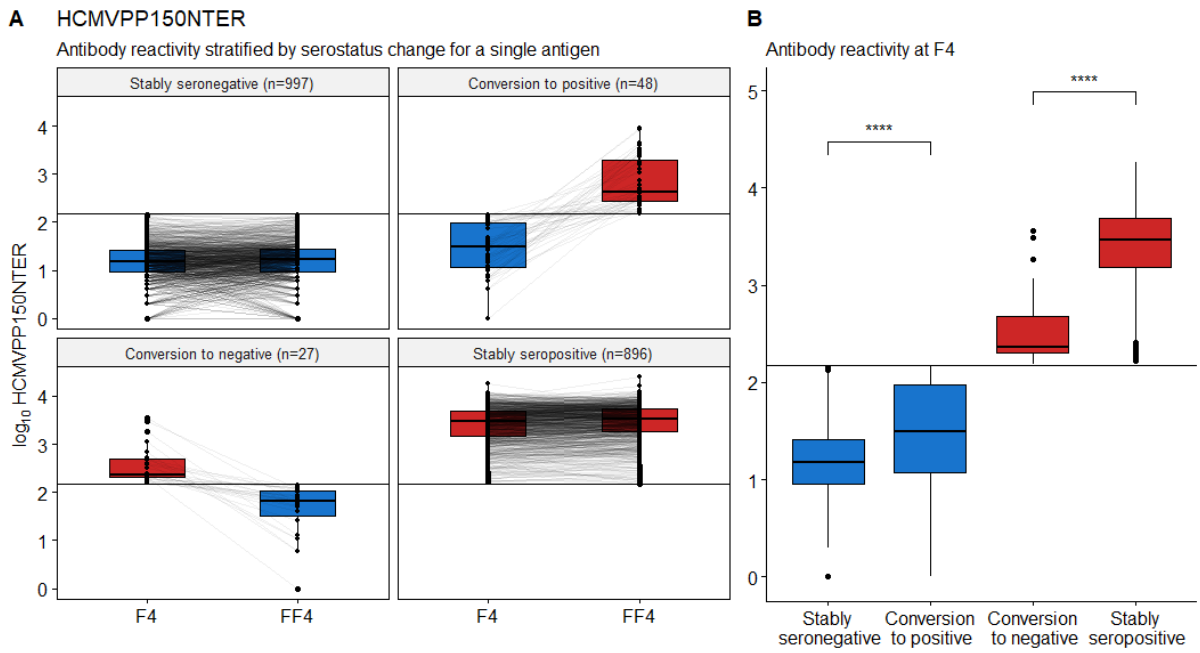

ESM Figure 17: Overview of serostatus change for CMV pp150 Nter antigen

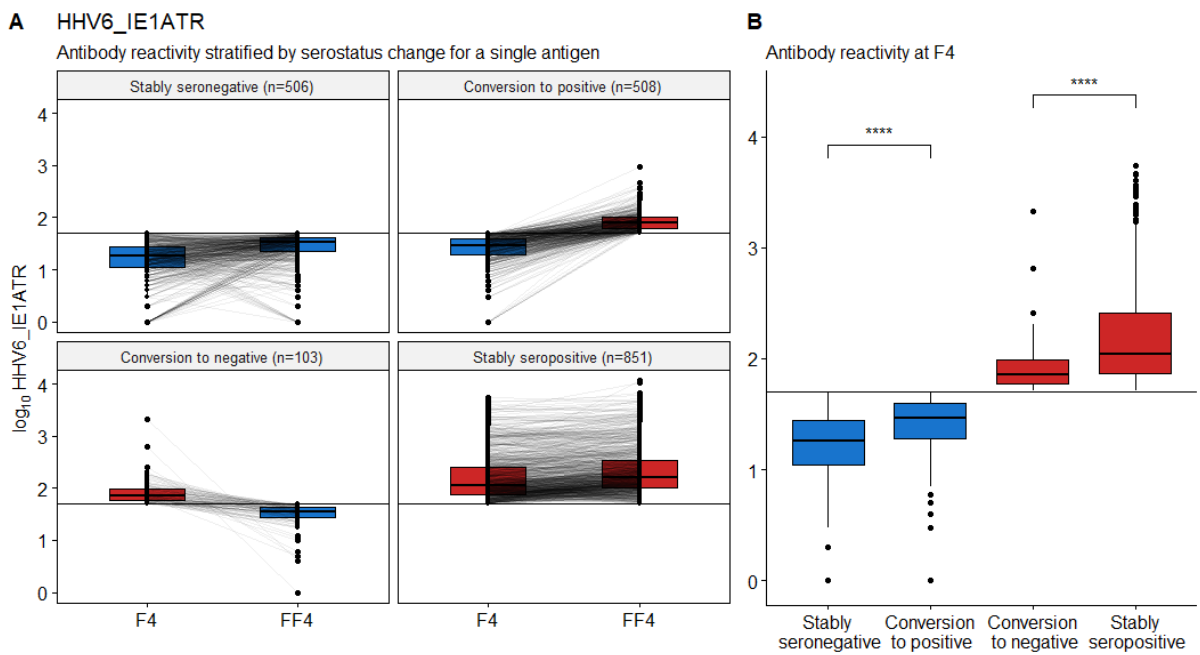

ESM Figure 18: Overview of serostatus change for HHV6 IE1A trunc. antigen

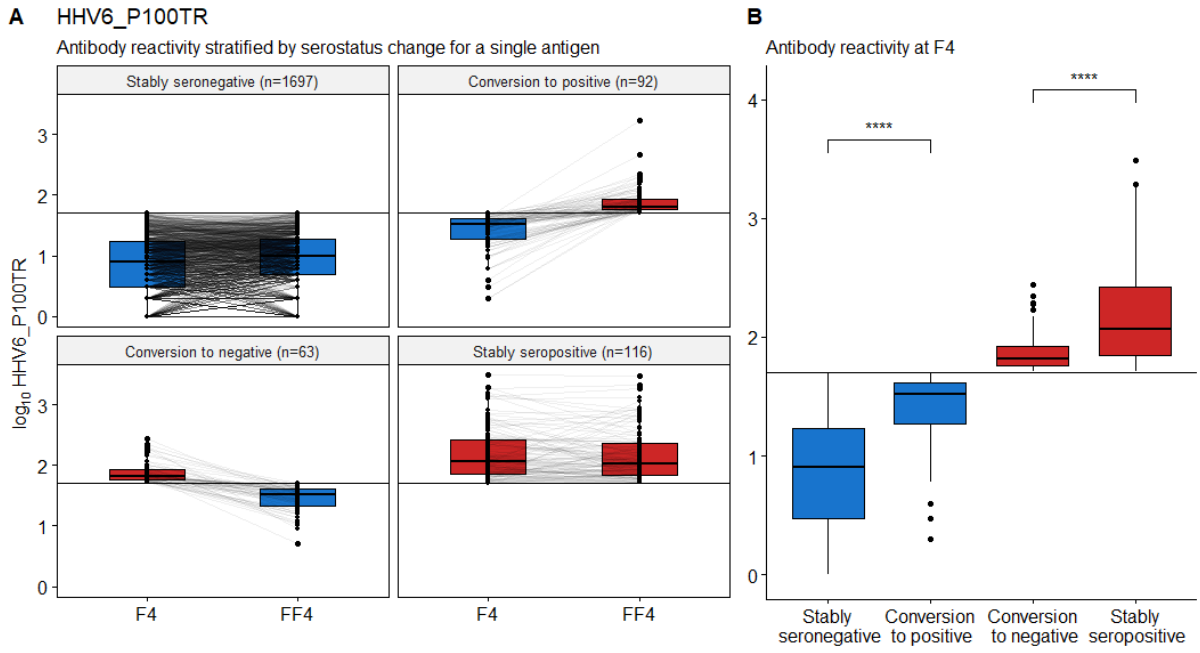

ESM Figure 19: Overview of serostatus change for HHV6 p100 trunc. antigen

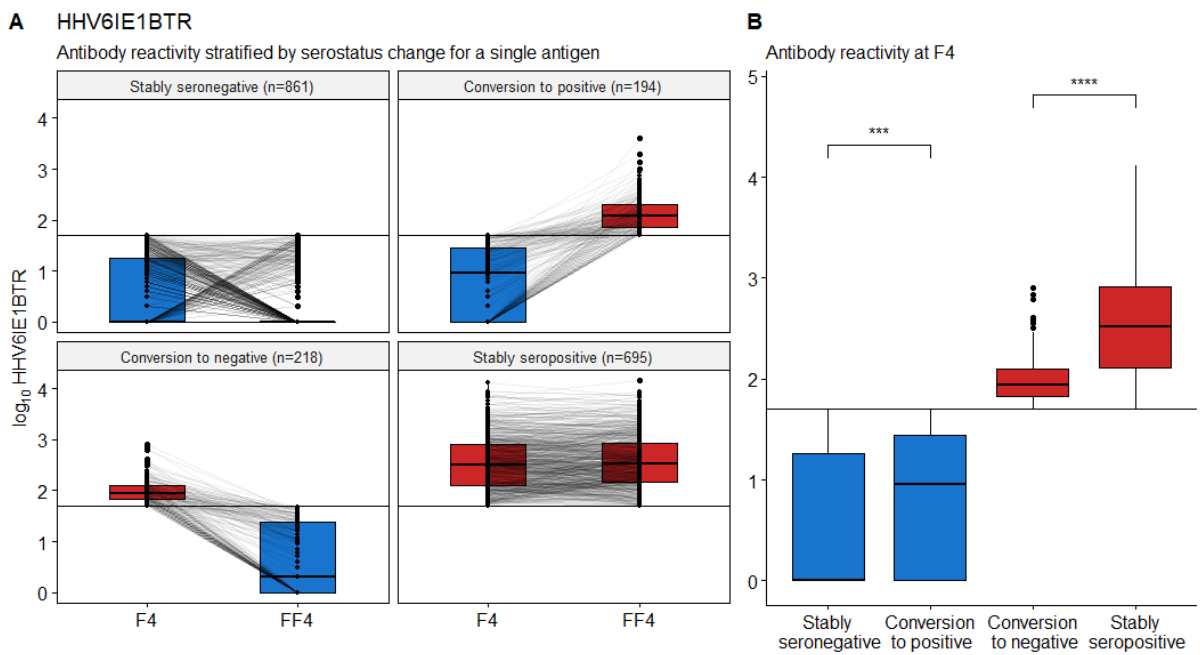

ESM Figure 20: Overview of serostatus change for HHV6 IE1B trunc. antigen

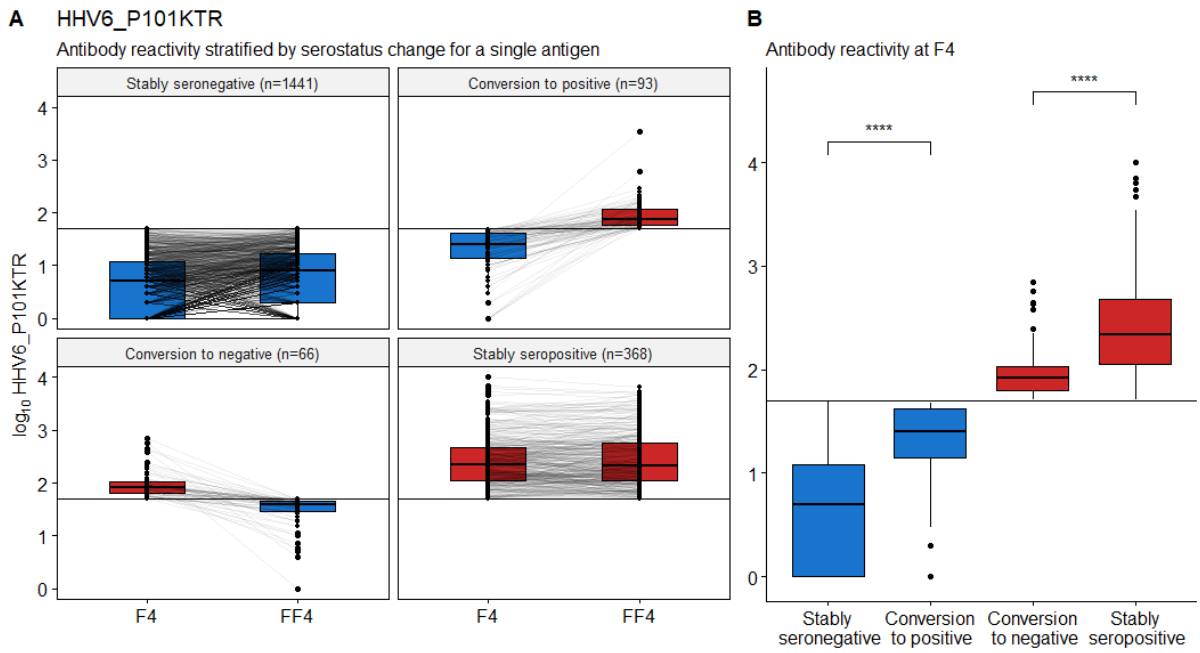

ESM Figure 21: Overview of serostatus change for HHV6 p101K trunc. antigen

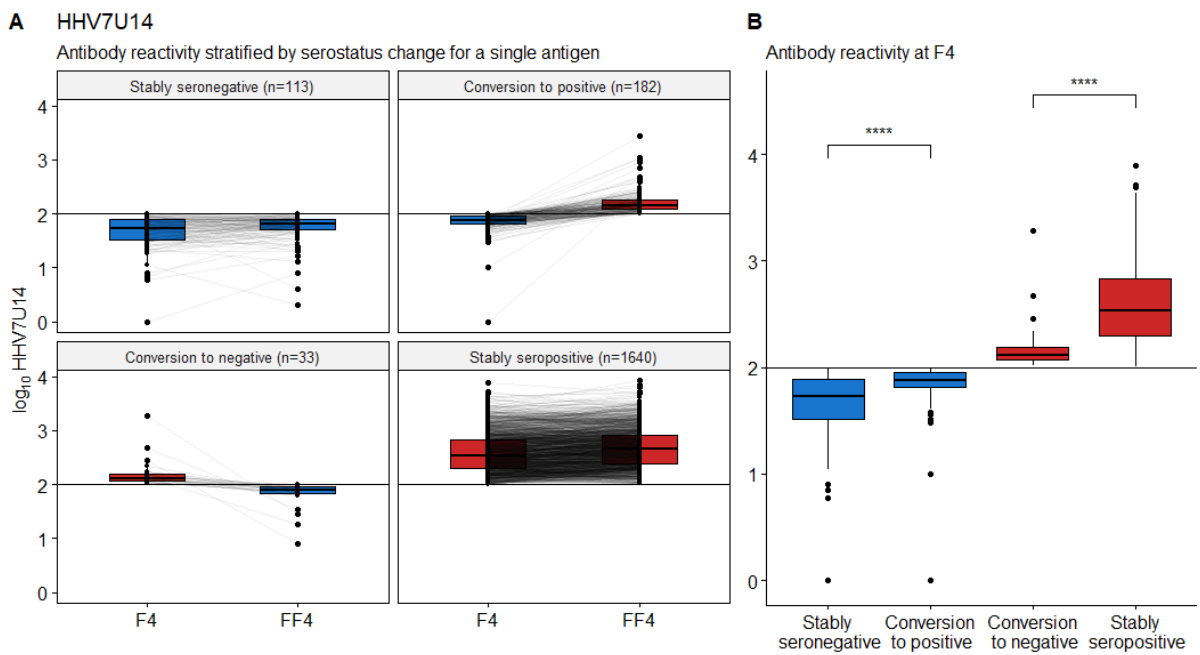

ESM Figure 22: Overview of serostatus change for HHV7 U14 antigen

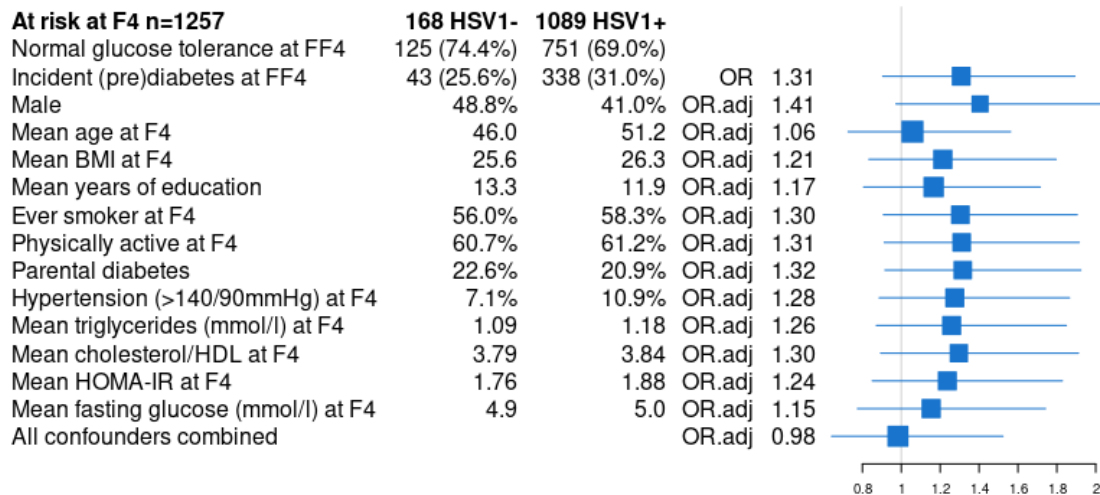

ESM Figure 23: Contingency table and contribution of individual covariates for the association of HSV1 with (pre)diabetes incidence

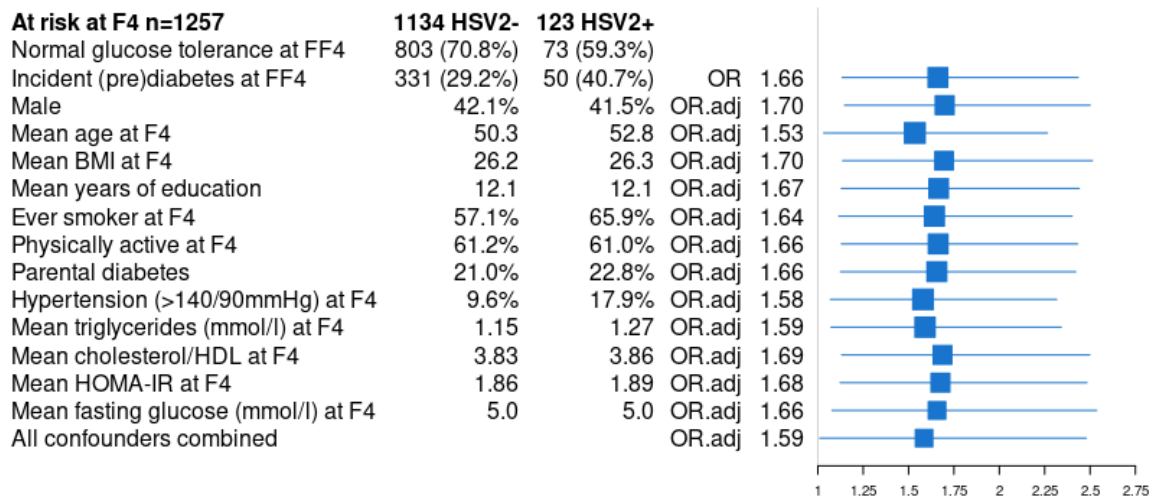

ESM Figure 24: Contingency table and contribution of individual covariates for the association of HSV2 with (pre)diabetes incidence

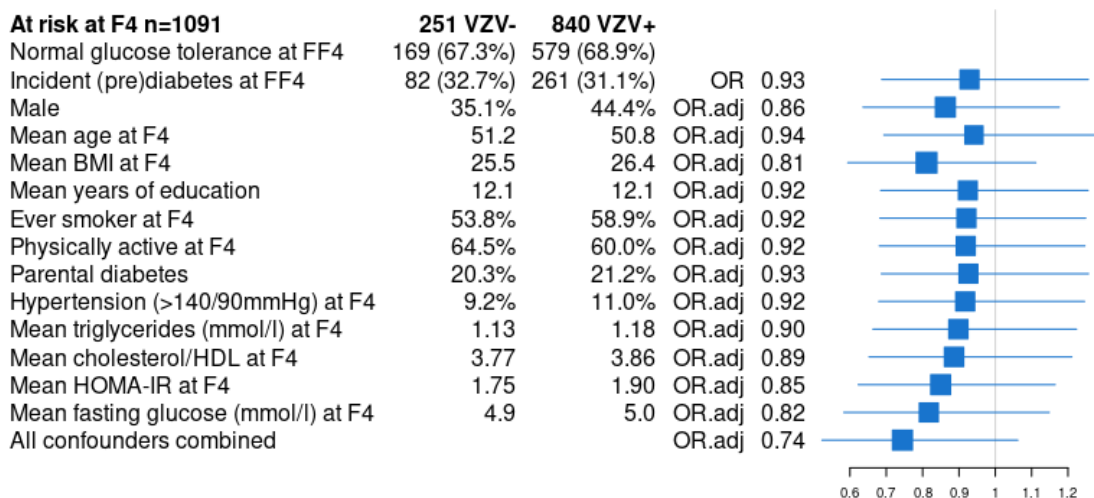

ESM Figure 25: Contingency table and contribution of individual covariates for the association of VZV with (pre)diabetes incidence

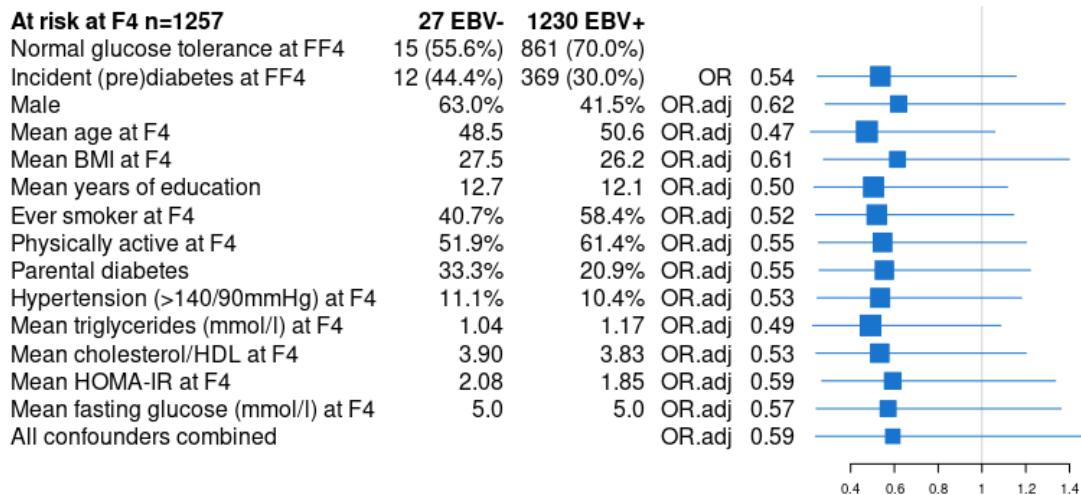

ESM Figure 26: Contingency table and contribution of individual covariates for the association of EBV with (pre)diabetes incidence

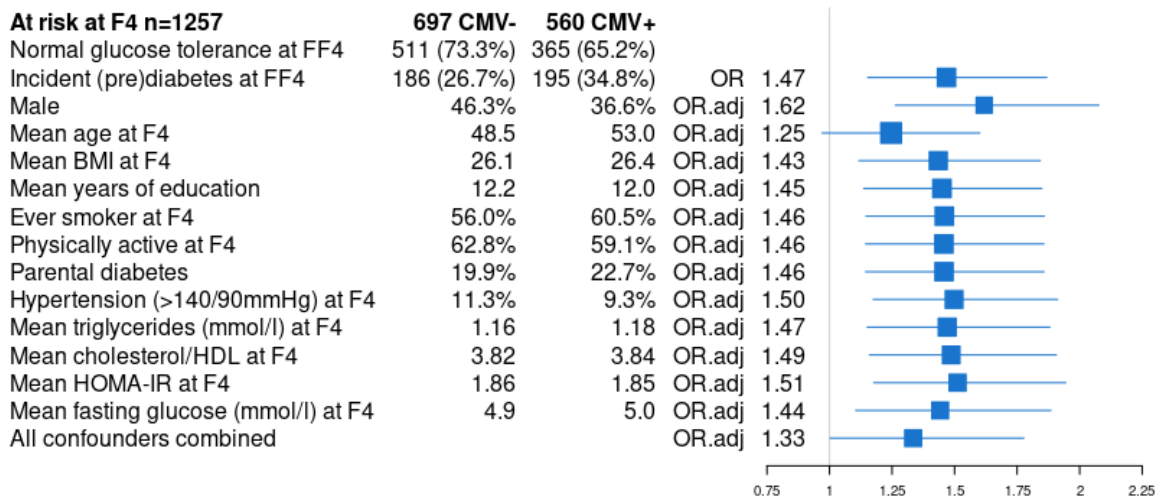

ESM Figure 27: Contingency table and contribution of individual covariates for the association of CMV with (pre)diabetes incidence

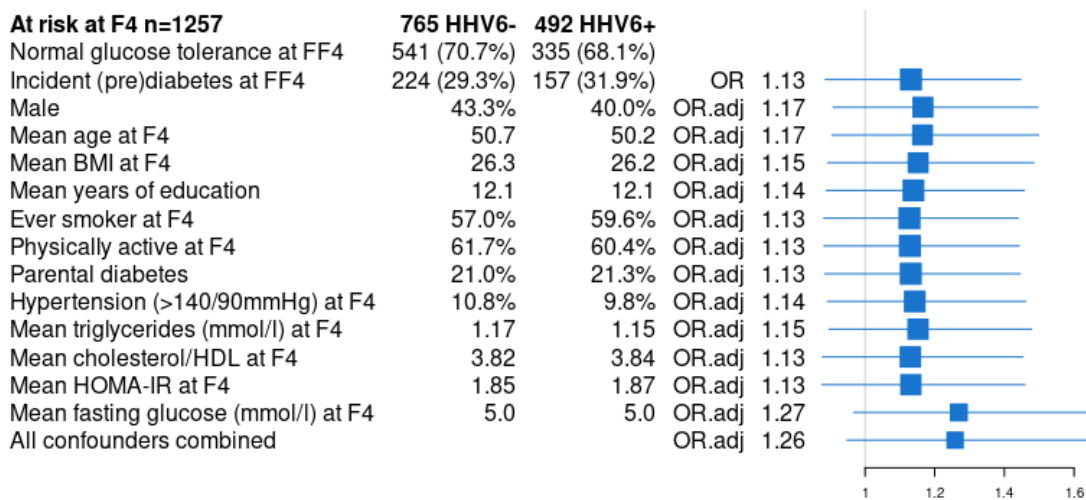

ESM Figure 28: Contingency table and contribution of individual covariates for the association of HHV6 with (pre)diabetes incidence

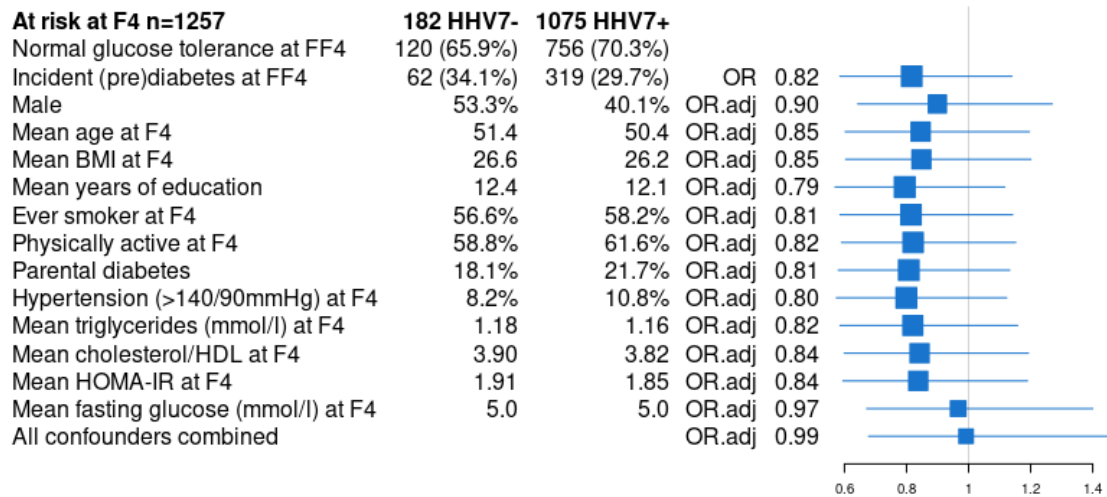

ESM Figure 29: Contingency table and contribution of individual covariates for the association of HHV7 with (pre)diabetes incidence

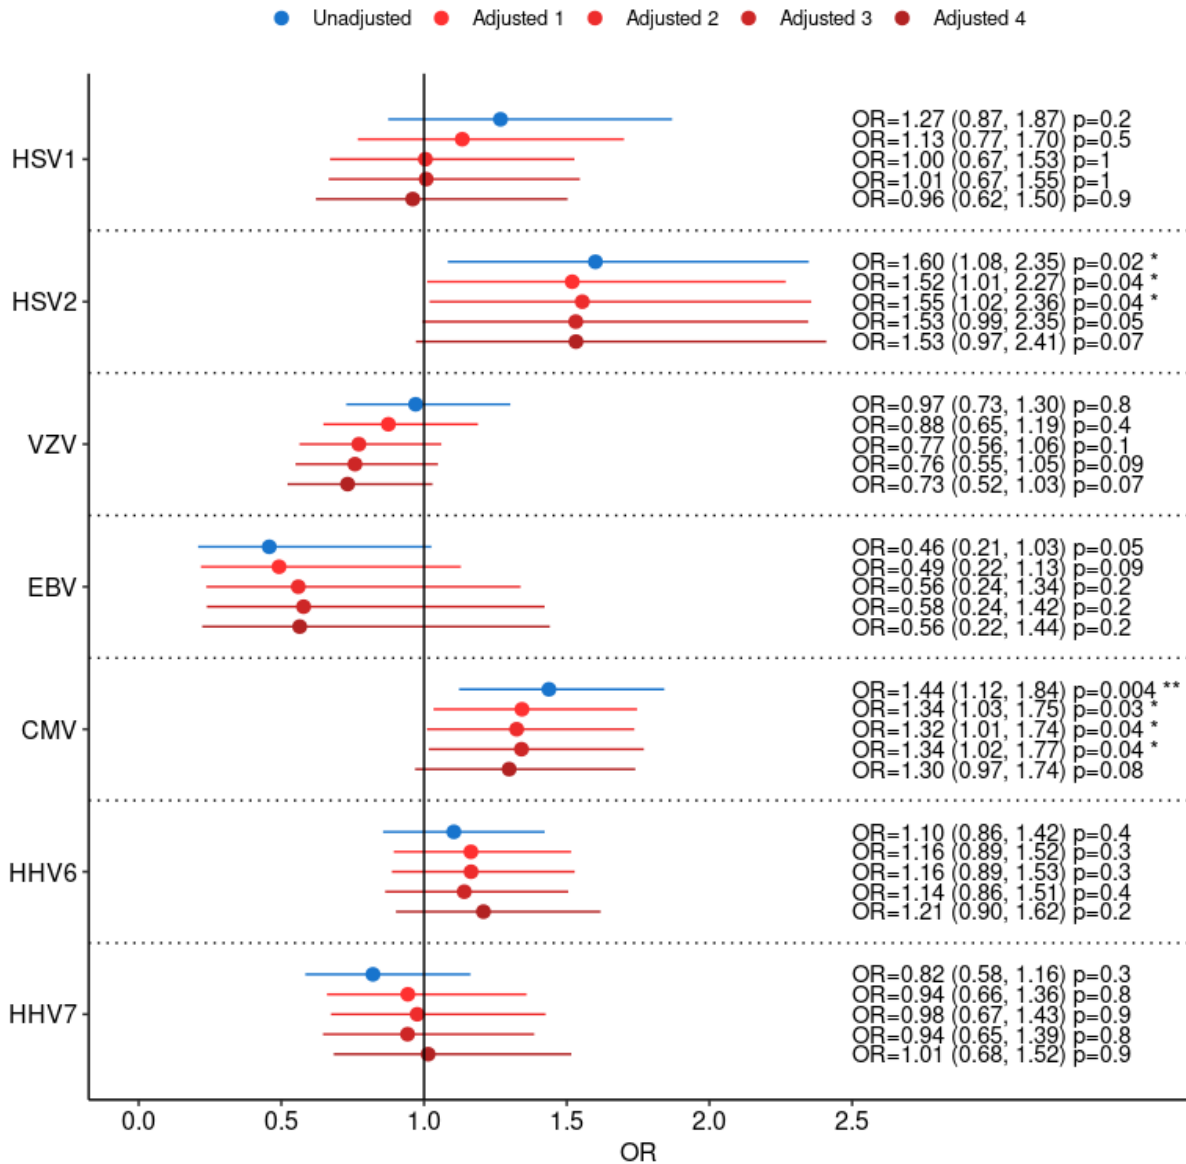

ESM Figure 30: Mutually adjusted associations of herpesvirus seropositivity with incidence of (pre)diabetes (n=1257, 95% CI in brackets)

Results are presented for unadjusted models and for models adjusted for:

- 1) sex, age
- 2) adjusted 1 plus BMI, education, smoking, physical activity
- 3) adjusted 2 plus parental diabetes, hypertension, triglycerides, total cholesterol/HDL, HOMA-IR
- 4) adjusted 3 plus fasting glucose

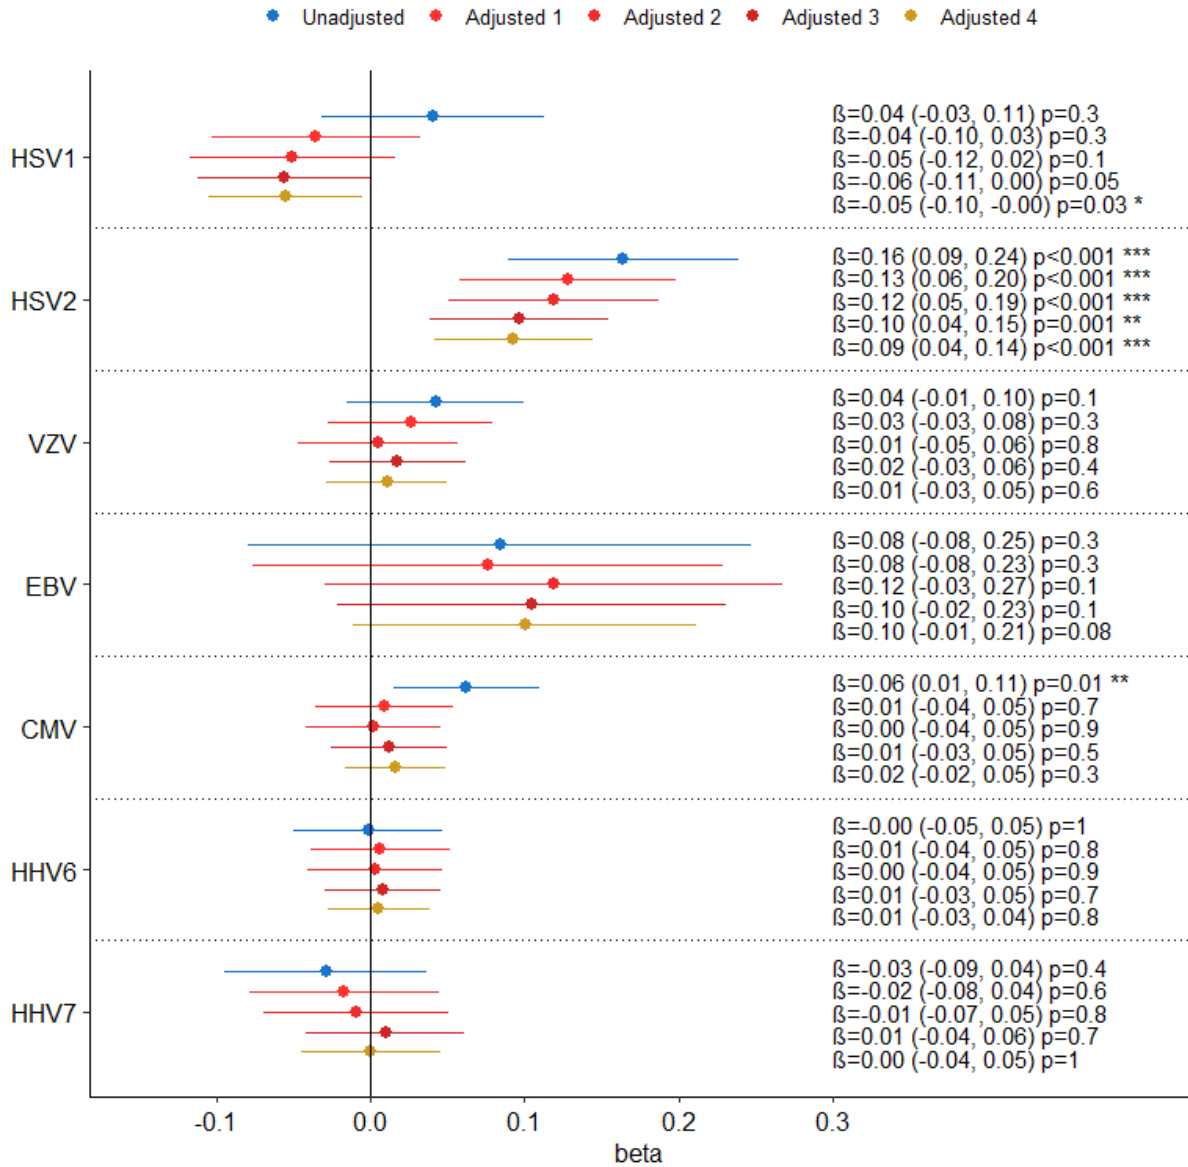

ESM Figure 31: Mutually adjusted cross-sectional association of herpesvirus serostatus with HbA1c at baseline (n=1967, 95% CI in brackets)

We report the regression coefficients ( $\beta$  and 95% CI) for unadjusted models and models adjusted for:

- 1) sex, age
- 2) adjusted 1 plus BMI, education, smoking, physical activity
- 3) adjusted 2 plus parental diabetes, hypertension, triglycerides, total cholesterol/HDL, HOMA-IR
- 4) adjusted 3 plus prevalence of (pre)diabetes
